# Supplementary material
Source: PubMed Central journal article supplement (PMC3992870)
Supplement: tpj201318x1.pdf [file tpj201318x1.pdf]

## Supplementary Materials – Figures

|            |              | True HLA allele                                                                                           |                                                                                                               |                                                                                                                            |
|------------|--------------|-----------------------------------------------------------------------------------------------------------|---------------------------------------------------------------------------------------------------------------|----------------------------------------------------------------------------------------------------------------------------|
|            |              | <i>H</i>                                                                                                  | Not <i>H</i>                                                                                                  |                                                                                                                            |
| Prediction | <i>H</i>     | True Positive                                                                                             | False Positive                                                                                                | <b>Positive Predictive Value</b> =<br>$\frac{\# \text{ of "true positive" }}{\# \text{ of "prediction is } H\text{"}}$     |
|            | Not <i>H</i> | False Negative                                                                                            | True Negative                                                                                                 | <b>Negative Predictive Value</b> =<br>$\frac{\# \text{ of "true negative" }}{\# \text{ of "prediction is not } H\text{"}}$ |
|            |              | <b>Sensitivity</b> =<br>$\frac{\# \text{ of "true positive" }}{\# \text{ of "true allele is } H\text{"}}$ | <b>Specificity</b> =<br>$\frac{\# \text{ of "true negative" }}{\# \text{ of "true allele is not } H\text{"}}$ | <b>Allele Accuracy</b> =<br>$\frac{\# \text{ of "true pos" + "true neg" }}{\text{grand sum}}$                              |

Figure S1: The standard statistical quantities of prediction quality for a specific HLA allele *H*: sensitivity, specificity, positive predictive value, negative predictive value and allele accuracy.

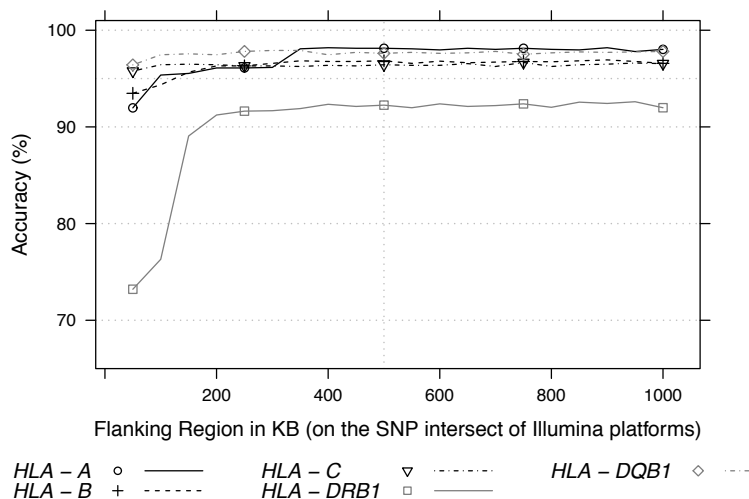

Figure S2: The relationships between the four-digit accuracies (no call threshold) and size of flanking region from 50kb to 1000kb on each side, stratified by HLA loci. The HIBAG models were built using the HLARES samples of European ancestry as the training data, and the imputation accuracies were assessed with the independent testing data of the British 1958 birth cohort study. SNP markers were genotyped on the intersect of Illumina platforms. A 500kb flanking region is an appropriate region for predicting HLA alleles.

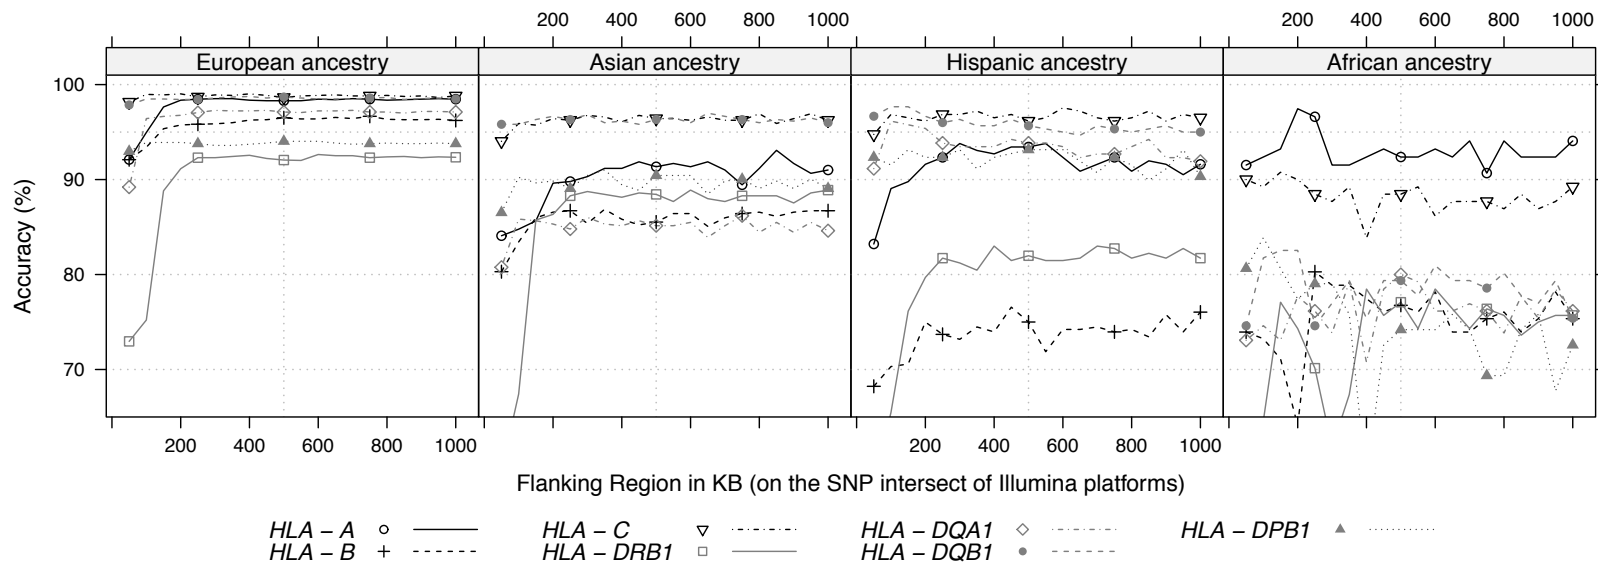

2

Figure S3: The relationships between the four-digit accuracies (no call threshold) and size of flanking region from 50kb to 1000kb on each side, stratified by HLA loci and ethnicities. STUDY Data were divided into training and validation sets with equal sizes for each ancestry and each HLA gene. SNP markers were genotyped on the intersect of Illumina platforms. A 500kb flanking region is an appropriate region for predicting HLA alleles.

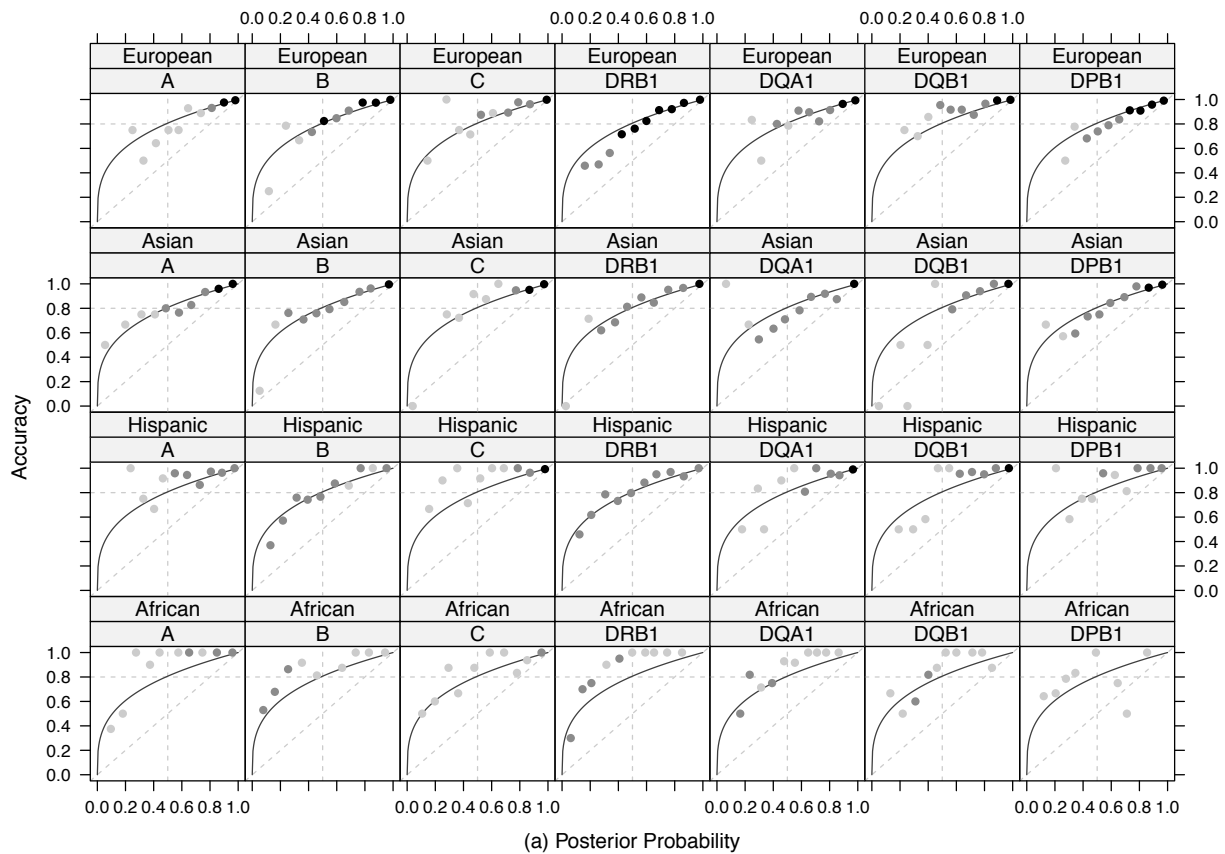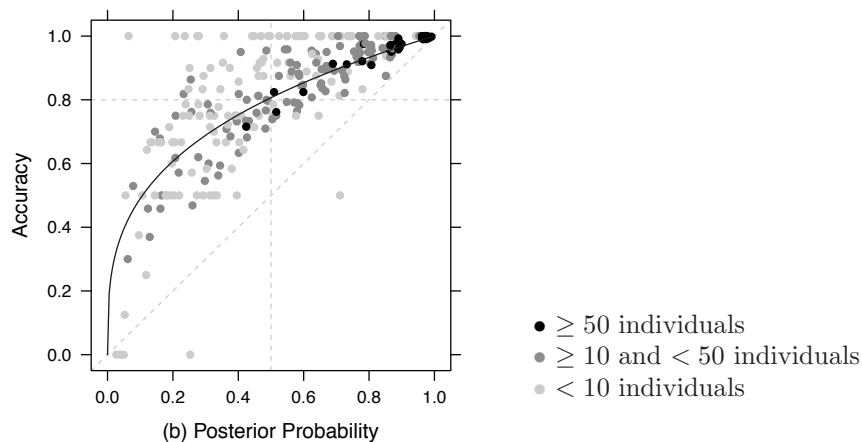

Figure S4: The relationship between posterior probability and overall accuracy. STUDY Data for each ancestry are divided into training and validation sets with equal sizes, and the accuracies are calculated from ten bins of posterior probabilities: (a) stratified by HLA loci and ancestries; (b) over all HLA loci and ancestries, the curve is fitted by a function  $y = x^r$  with a parameter  $r = 0.31$ , and 0.5 posterior probability approximately corresponds to the prediction accuracy 80%.

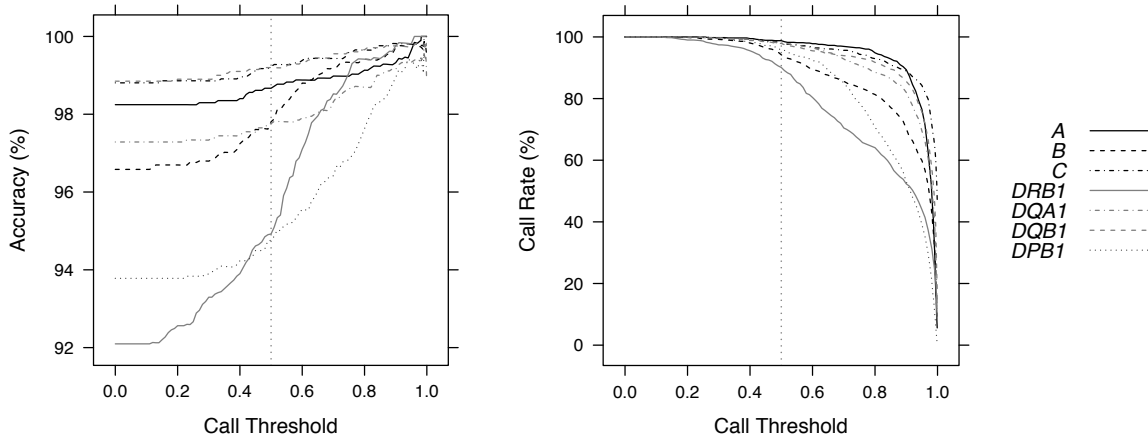

Figure S5: The relationships among call threshold, accuracy and call rate when HLARES data for individuals of European ancestry are divided into training and validation sets with equal sizes.

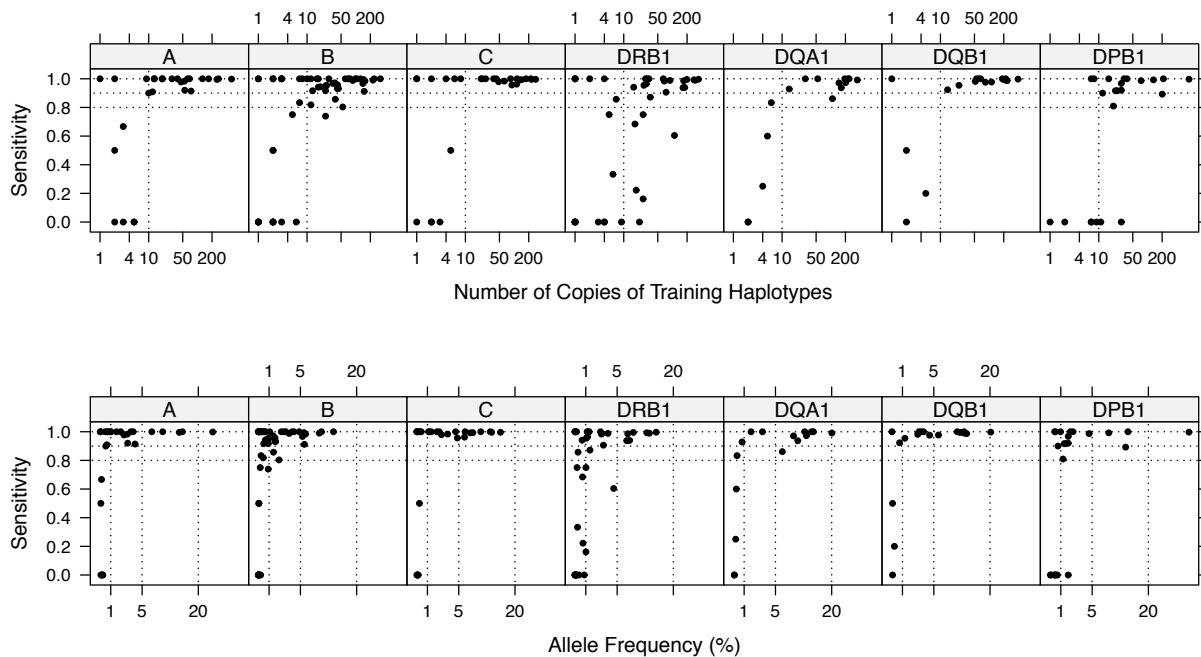

Figure S6: The relationship between four-digit sensitivities (no call threshold) and the number of copies of training haplotypes for each HLA allele when HLARES data for individuals of European ancestry were divided into training and validation sets with equal sizes. SNP markers on the intersect of Illumina platforms were used. For *A*, *C*, *DQA1*, *DQB1* and *DPB1*, 10 copies of training haplotypes seem sufficient to attain 90% sensitivity, but *B* and *DRB1* require many more training haplotypes.

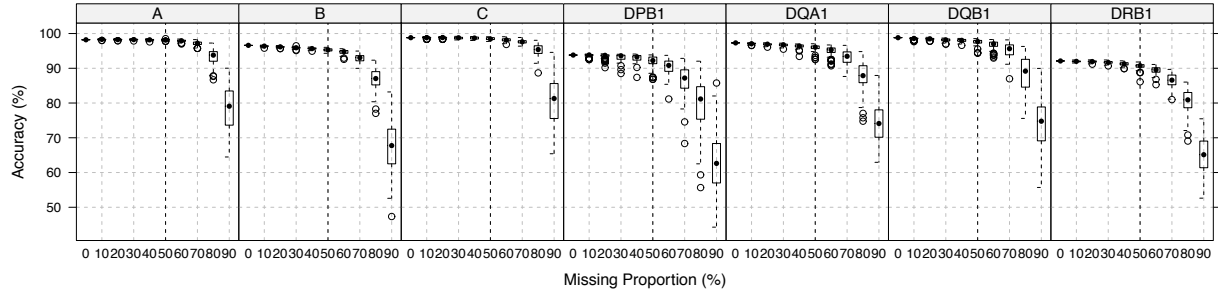

(a) no call threshold: accuracy vs. missing proportion.

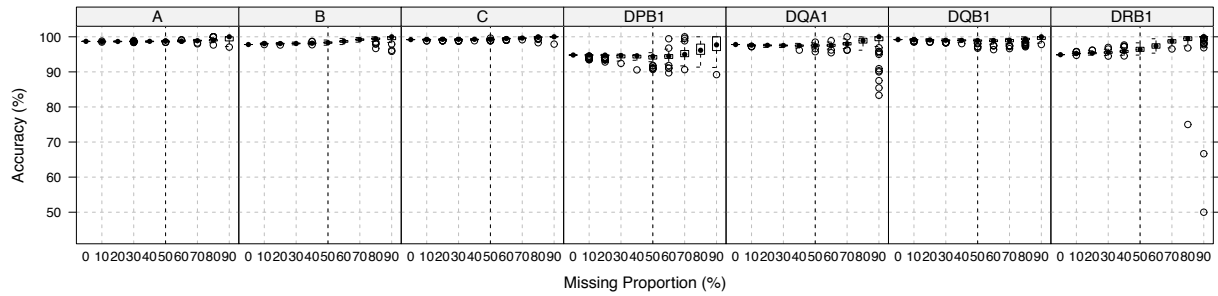

(b) 0.5 call threshold: accuracy vs. missing proportion.

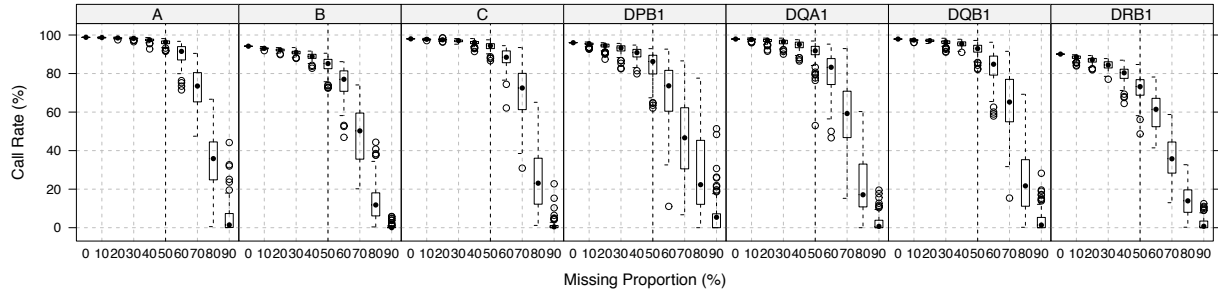

(c) 0.5 call threshold: call rate vs. missing proportion.

Figure S7: Box plots of accuracy and call rate with missing SNPs. HLARES data of European ancestry were divided into training and validation sets with equal sizes. The HIBAG models were built using the training parts. For each run of simulation, a fraction of the SNP predictors used in the ensemble classifier (e.g, 10%, 20%) was removed randomly for the validation set, where every validation sample has the same missing SNPs, and repeat it 100 times. The missing SNPs do not significantly reduce the accuracies for missing fraction  $< 80\%$ , but it does decrease the call rates.

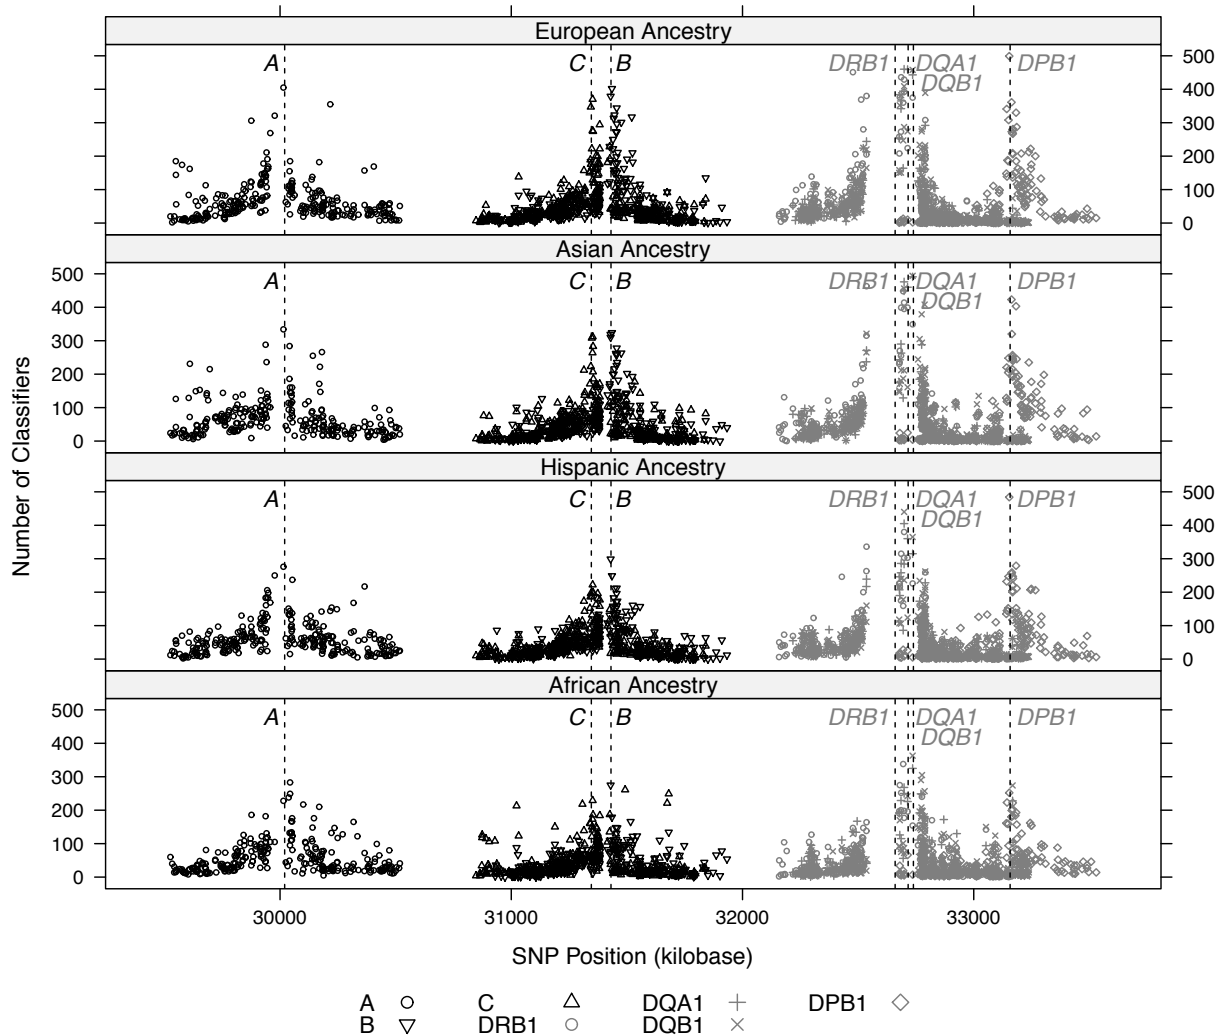

Figure S8: The number of classifiers used in the published pre-fit models for each SNP predictor. Each HIBAG model consists of 500 individual classifiers, and more important SNP markers tend to be used more frequently.

## Supplementary Materials – Tables

Table S1: Assessing the prediction accuracies using different model parameter settings, when STUDY Data of European ancestry were divided into training and validation sets with equal sizes. No call threshold was executed<sup>1</sup>.

| Accuracy (%)                              | <i>HLA –</i> |          |          |             |             |             |             |
|-------------------------------------------|--------------|----------|----------|-------------|-------------|-------------|-------------|
|                                           | <i>A</i>     | <i>B</i> | <i>C</i> | <i>DRB1</i> | <i>DQA1</i> | <i>DQB1</i> | <i>DPB1</i> |
| # of SNPs <sup>2</sup>                    | 273          | 341      | 356      | 327         | 349         | 356         | 279         |
| # of training samples                     | 945          | 1314     | 944      | 1234        | 874         | 968         | 820         |
| # of validation samples                   | 912          | 1258     | 922      | 1202        | 866         | 956         | 804         |
| The total number of classifiers $K = 25$  |              |          |          |             |             |             |             |
| $m_{\text{try}} = 1$                      | 98.1         | 95.9     | 98.3     | 91.4        | 96.4        | 97.4        | 93.3        |
| $m_{\text{try}} = \sqrt{m}$               | 98.4         | 96.4     | 98.5     | 92.0        | 97.2        | 98.6        | 93.7        |
| $m_{\text{try}} = \frac{1}{3}m$           | 98.2         | 95.7     | 99.0     | 91.3        | 96.7        | 98.6        | 93.5        |
| $m_{\text{try}} = m$                      | 98.5         | 95.7     | 99.0     | 91.5        | 96.7        | 98.5        | 93.5        |
| The total number of classifiers $K = 100$ |              |          |          |             |             |             |             |
| $m_{\text{try}} = 1$                      | 98.2         | 96.1     | 98.3     | 92.1        | 96.6        | 97.7        | 93.4        |
| $m_{\text{try}} = \sqrt{m}$               | 98.2         | 96.6     | 98.8     | 92.1        | 97.3        | 98.8        | 93.8        |
| $m_{\text{try}} = \frac{1}{3}m$           | 98.4         | 95.8     | 99.1     | 91.5        | 96.8        | 98.7        | 93.7        |
| $m_{\text{try}} = m$                      | 98.5         | 95.8     | 99.0     | 91.7        | 96.7        | 98.7        | 93.4        |

<sup>1</sup>:  $K$  is the total number of individual classifiers,  $m$  is the total number of SNP markers, and  $m_{\text{try}}$  is the number of variables randomly sampled as candidates for each selection.

<sup>2</sup>: SNP markers common to the Illumina 1M Duo, OmniQuad, OmniExpress, 660K and 550K platforms within a flanking region of 500kb are used.

Table S2: Assessing the computational times (hour) of building a HIBAG model for our published parameter estimates of European ancestry on a Linux system with Intel processor (2.27GHz) and 32 GB RAM.

|                                                                  | <i>HLA –</i> |          |          |             |             |             |             |
|------------------------------------------------------------------|--------------|----------|----------|-------------|-------------|-------------|-------------|
|                                                                  | <i>A</i>     | <i>B</i> | <i>C</i> | <i>DRB1</i> | <i>DQA1</i> | <i>DQB1</i> | <i>DPB1</i> |
| # of SNPs <sup>1</sup>                                           | 273          | 341      | 356      | 327         | 349         | 356         | 279         |
| # of HLA alleles                                                 | 48           | 88       | 37       | 55          | 17          | 21          | 26          |
| # of training samples                                            | 1504         | 2030     | 1493     | 1909        | 1380        | 1517        | 1274        |
| Building a HIBAG model: computing time per individual classifier |              |          |          |             |             |             |             |
|                                                                  | 0.86h        | 6.12h    | 0.84h    | 3.36h       | 0.58h       | 0.56h       | 0.28h       |

<sup>1</sup>: SNP markers common to the Illumina 1M Duo, OmniQuad, OmniExpress, 660K and 550K platforms within a flanking region of 500kb are used.

Table S3: Summary of the four-digit accuracies from HIBAG and BEAGLE using the same SNP sets. STUDY Data were randomly divided into training and validation sets with equal sizes for each ancestry. No call threshold was used, and the SNP markers within a 500kb flanking region on each side were used.

| Accuracy (%)                          | <i>HLA</i> – |          |          |             |             |             |             |
|---------------------------------------|--------------|----------|----------|-------------|-------------|-------------|-------------|
|                                       | <i>A</i>     | <i>B</i> | <i>C</i> | <i>DRB1</i> | <i>DQA1</i> | <i>DQB1</i> | <i>DPB1</i> |
| <b><i>European ancestry</i></b>       |              |          |          |             |             |             |             |
| # of training samples                 | 945          | 1314     | 944      | 1234        | 874         | 968         | 820         |
| # of validation samples               | 912          | 1258     | 922      | 1202        | 866         | 956         | 804         |
| # of HLA alleles                      | 48           | 88       | 37       | 55          | 17          | 21          | 26          |
| # of SNPs <sup>1</sup> (1M/intersect) | 937/273      | 942/341  | 979/356  | 921/327     | 964/349     | 979/356     | 786/279     |
| BEAGLE – 1M                           | 98.5         | 95.9     | 98.4     | 93.3        | 97.1        | 98.7        | 95.2        |
| HIBAG – 1M                            | 98.5         | 96.4     | 98.6     | 92.4        | 97.3        | 98.7        | 95.9        |
| BEAGLE – Common                       | 98.1         | 95.5     | 97.7     | 92.9        | 96.4        | 97.9        | 94.7        |
| HIBAG – Common                        | 98.2         | 96.6     | 98.8     | 92.1        | 97.3        | 98.8        | 93.8        |
| <b><i>Asian ancestry</i></b>          |              |          |          |             |             |             |             |
| # of training samples                 | 317          | 378      | 318      | 363         | 298         | 313         | 271         |
| # of validation samples               | 289          | 335      | 293      | 333         | 286         | 299         | 256         |
| # of HLA alleles                      | 42           | 72       | 34       | 48          | 17          | 18          | 27          |
| # of SNPs <sup>1</sup> (1M/intersect) | 942/259      | 942/334  | 974/346  | 934/319     | 973/341     | 995/348     | 803/272     |
| BEAGLE – 1M                           | 93.4         | 87.0     | 96.6     | 89.5        | 87.0        | 98.2        | 91.8        |
| HIBAG – 1M                            | 92.1         | 87.8     | 96.9     | 91.7        | 89.2        | 98.2        | 91.0        |
| BEAGLE – Common                       | 93.8         | 83.7     | 94.5     | 87.7        | 86.7        | 97.3        | 91.2        |
| HIBAG – Common                        | 92.1         | 87.5     | 96.6     | 88.7        | 86.8        | 96.0        | 89.8        |
| <b><i>Hispanic ancestry</i></b>       |              |          |          |             |             |             |             |
| # of training samples                 | 161          | 238      | 157      | 223         | 139         | 162         | 139         |
| # of validation samples               | 137          | 192      | 143      | 197         | 130         | 150         | 124         |
| # of HLA alleles                      | 41           | 85       | 32       | 44          | 14          | 17          | 26          |
| # of SNPs <sup>1</sup> (1M/intersect) | 965/274      | 966/341  | 996/356  | 954/326     | 992/348     | 1013/355    | 824/278     |
| BEAGLE – 1M                           | 88.7         | 75.8     | 92.0     | 78.4        | 94.2        | 97.7        | 94.9        |
| HIBAG – 1M                            | 91.6         | 74.0     | 95.5     | 82.0        | 96.9        | 98.0        | 95.6        |
| BEAGLE – Common                       | 89.1         | 75.0     | 92.3     | 78.7        | 94.6        | 96.3        | 91.9        |
| HIBAG – Common                        | 93.4         | 75.0     | 96.2     | 82.0        | 93.8        | 95.7        | 93.1        |
| <b><i>African ancestry</i></b>        |              |          |          |             |             |             |             |
| # of training samples                 | 81           | 100      | 74       | 89          | 69          | 74          | 44          |
| # of validation samples               | 59           | 71       | 65       | 72          | 65          | 63          | 31          |
| # of HLA alleles                      | 36           | 45       | 24       | 30          | 13          | 17          | 23          |
| # of SNPs <sup>1</sup> (1M/intersect) | 949/266      | 948/335  | 981/349  | 945/325     | 983/343     | 1004/351    | 816/269     |
| BEAGLE – 1M                           | 96.6         | 70.4     | 87.7     | 73.6        | 86.2        | 84.1        | 85.5        |
| HIBAG – 1M                            | 95.8         | 81.0     | 90.0     | 84.0        | 85.4        | 80.2        | 82.3        |
| BEAGLE – Common                       | 93.2         | 71.1     | 86.9     | 81.2        | 79.2        | 76.2        | 79.0        |
| HIBAG – Common                        | 92.4         | 76.8     | 88.5     | 77.1        | 80.0        | 79.4        | 74.2        |

<sup>1</sup>: Illumina Human1M / Common to the Illumina 1M Duo, OmniQuad, OmniExpress, 660K and 550K platforms.



Table S4: The SNP list used by HLA\*IMP when Illumina 1M platform is specified.

| Locus (# of SNPs)    | Marker list                                                                                                                                                                                                                                                                                                                                                                                                                                                                                                                                                                                   |
|----------------------|-----------------------------------------------------------------------------------------------------------------------------------------------------------------------------------------------------------------------------------------------------------------------------------------------------------------------------------------------------------------------------------------------------------------------------------------------------------------------------------------------------------------------------------------------------------------------------------------------|
| <i>HLA-A</i> (50)    | rs1737083, rs9391630, rs4947236, rs9258275, rs1737060, rs1633041,<br>rs1737043, rs1633021, rs9258437, rs2517922, rs1632988, rs2523409,<br>rs1610663, rs1610707, rs3115630, rs915669, rs2517892, rs2734999,<br>rs3115629, rs2394185, rs9380146, rs9258631, rs2734979, rs2508049,<br>rs2508046, rs3094159, rs2734959, rs2517817, rs2517904, rs2517891,<br>rs1611493, rs2517755, rs2860580, rs2517722, rs7745413, rs7747253,<br>rs7739434, rs9260759, rs5009448, rs2735076, rs2735071, rs3132685,<br>rs5025708, rs3121597, rs166326, rs16896944, rs3132129, rs1150738,<br>rs1245371, rs11965797  |
| <i>HLA-B</i> (39)    | rs1265156, rs4713438, rs3130466, rs9295967, rs9263979, rs6904669,<br>rs2524099, rs2524123, rs9461688, rs2524229, rs9295976, rs9265797,<br>rs2442719, rs2596501, rs1058026, rs2523591, rs2523590, rs2523589,<br>rs2523578, rs2523557, rs2844573, rs6936035, rs3094600, rs9266689,<br>rs2442752, rs2596560, rs2523471, rs2256175, rs9266845, rs3094738,<br>rs2596460, rs3094228, rs2395030, rs2284178, rs2523674, rs2905722,<br>rs2523710, rs2534671, rs2855807                                                                                                                                 |
| <i>HLA-C</i> (27)    | rs9263719, rs3823417, rs1265099, rs2074478, rs1265094, rs130075,<br>rs9263800, rs1265158, rs3130467, rs3130531, rs2844623, rs9264532,<br>rs2524099, rs2395471, rs2249742, rs2524084, rs12111032, rs6906846,<br>rs6917363, rs3915971, rs7761965, rs9264942, rs7453967, rs2442719,<br>rs2523535, rs2844529, rs3763288                                                                                                                                                                                                                                                                           |
| <i>HLA-DRB1</i> (50) | rs6907322, rs2273017, rs2050190, rs2076536, rs2073045, rs2050189,<br>rs4248166, rs3817964, rs3793126, rs10947262, rs3806155, rs6932542,<br>rs2395163, rs3135363, rs2027856, rs3129882, rs2239804, rs6919855,<br>rs9268862, rs5020946, rs9270623, rs4599680, rs615672, rs2858867,<br>rs482044, rs660895, rs2097431, rs9273012, rs6906021, rs3134975,<br>rs9275184, rs7774434, rs2647044, rs9275424, rs9275425, rs9275572,<br>rs7745656, rs2858332, rs3957148, rs3873444, rs9275602, rs3892710,<br>rs5024431, rs12177980, rs7755596, rs17500468, rs10807113, rs4947347,<br>rs2071550, rs6903130 |
| <i>HLA-DQB1</i> (34) | rs3117099, rs3817964, rs3763305, rs743862, rs3129867, rs2239802,<br>rs4599680, rs482044, rs13207945, rs9272723, rs6927022, rs6906021,<br>rs1063355, rs2300825, rs3891175, rs3828796, rs7755224, rs3134975,<br>rs2856691, rs2856683, rs7774434, rs9275224, rs9275313, rs3135006,<br>rs9275555, rs3104402, rs3104405, rs9275601, rs3892710, rs6935940,<br>rs2395246, rs17500510, rs2071800, rs719654                                                                                                                                                                                            |

Table S5: The sensitivity (SEN), specificity (SPE), positive predictive value (PPV) and negative predictive value (NPV) calculated from validation samples for each four-digit HLA allele with call threshold 0.5, when STUDY Data of European ancestry were divided to training and validation parts with equal sizes. The SNP markers in the intersect of Illumina platforms were used.

| Allele <sup>1</sup>                   | Num. Train | Freq. Train | Num. Valid. | Freq. Valid. | CR <sup>2</sup> (%) | ACC <sup>3</sup> (%) | SEN (%) | SPE (%) | PPV (%) | NPV (%) | Miscall <sup>4</sup> (%) |
|---------------------------------------|------------|-------------|-------------|--------------|---------------------|----------------------|---------|---------|---------|---------|--------------------------|
| <i>HLA-A: Overall accuracy: 98.7%</i> |            |             |             |              |                     |                      |         |         |         |         |                          |
| 01:01                                 | 270        | 0.1429      | 271         | 0.1486       | 99.6                | 100.0                | 100.0   | 100.0   | 100.0   | 100.0   | –                        |
| 02:01                                 | 503        | 0.2661      | 533         | 0.2922       | 99.2                | 99.7                 | 100.0   | 99.5    | 98.9    | 100.0   | –                        |
| 02:02                                 | 3          | 0.0016      | 3           | 0.0016       | 100.0               | 99.9                 | 66.7    | 100.0   | 100.0   | 99.9    | 02:05 (100)              |
| 02:05                                 | 19         | 0.0101      | 19          | 0.0104       | 100.0               | 99.9                 | 100.0   | 99.9    | 95.0    | 100.0   | –                        |
| 03:01                                 | 252        | 0.1333      | 234         | 0.1283       | 99.6                | 99.8                 | 100.0   | 99.8    | 98.7    | 100.0   | –                        |
| 11:01                                 | 127        | 0.0672      | 120         | 0.0658       | 99.2                | 100.0                | 100.0   | 100.0   | 100.0   | 100.0   | –                        |
| 23:01                                 | 39         | 0.0206      | 42          | 0.0230       | 100.0               | 100.0                | 100.0   | 100.0   | 100.0   | 100.0   | –                        |
| 24:02                                 | 170        | 0.0899      | 141         | 0.0773       | 97.9                | 99.7                 | 100.0   | 99.7    | 96.5    | 100.0   | –                        |
| 25:01                                 | 55         | 0.0291      | 50          | 0.0274       | 98.0                | 99.6                 | 91.8    | 99.8    | 91.8    | 99.8    | 26:01 (100)              |
| 26:01                                 | 74         | 0.0392      | 70          | 0.0384       | 98.6                | 99.4                 | 92.8    | 99.7    | 92.8    | 99.7    | 25:01 (80)               |
| 29:01                                 | 10         | 0.0053      | 10          | 0.0055       | 80.0                | 100.0                | 100.0   | 100.0   | 100.0   | 100.0   | –                        |
| 29:02                                 | 63         | 0.0333      | 57          | 0.0312       | 98.2                | 100.0                | 100.0   | 100.0   | 100.0   | 100.0   | –                        |
| 30:01                                 | 30         | 0.0159      | 27          | 0.0148       | 100.0               | 100.0                | 100.0   | 100.0   | 100.0   | 100.0   | –                        |
| 30:02                                 | 19         | 0.0101      | 17          | 0.0093       | 100.0               | 100.0                | 100.0   | 100.0   | 100.0   | 100.0   | –                        |
| 31:01                                 | 46         | 0.0243      | 45          | 0.0247       | 93.3                | 100.0                | 100.0   | 100.0   | 100.0   | 100.0   | –                        |
| 32:01                                 | 69         | 0.0365      | 66          | 0.0362       | 100.0               | 100.0                | 100.0   | 100.0   | 100.0   | 100.0   | –                        |
| 33:01                                 | 13         | 0.0069      | 12          | 0.0066       | 100.0               | 100.0                | 100.0   | 100.0   | 100.0   | 100.0   | –                        |
| 33:03                                 | 9          | 0.0048      | 9           | 0.0049       | 100.0               | 100.0                | 100.0   | 100.0   | 100.0   | 100.0   | –                        |
| 34:02                                 | 2          | 0.0011      | 1           | 0.0005       | 100.0               | 100.0                | 100.0   | 100.0   | 100.0   | 100.0   | –                        |
| 66:01                                 | 12         | 0.0063      | 11          | 0.0060       | 100.0               | 99.9                 | 90.9    | 100.0   | 100.0   | 99.9    | 26:01 (100)              |
| 68:01                                 | 54         | 0.0286      | 58          | 0.0318       | 96.6                | 100.0                | 100.0   | 100.0   | 100.0   | 100.0   | –                        |
| 68:02                                 | 13         | 0.0069      | 11          | 0.0060       | 100.0               | 100.0                | 100.0   | 100.0   | 100.0   | 100.0   | –                        |
| 69:01                                 | 2          | 0.0011      | 2           | 0.0011       | 50.0                | 100.0                | 100.0   | 100.0   | 100.0   | 100.0   | –                        |
| <i>HLA-B: Overall accuracy: 97.8%</i> |            |             |             |              |                     |                      |         |         |         |         |                          |
| 07:02                                 | 319        | 0.1214      | 291         | 0.1157       | 97.3                | 99.9                 | 100.0   | 99.9    | 99.3    | 100.0   | –                        |
| 07:05                                 | 8          | 0.0030      | 7           | 0.0028       | 100.0               | 100.0                | 100.0   | 100.0   | 100.0   | 100.0   | –                        |
| 08:01                                 | 239        | 0.0909      | 262         | 0.1041       | 97.3                | 100.0                | 100.0   | 100.0   | 100.0   | 100.0   | –                        |
| 13:02                                 | 87         | 0.0331      | 85          | 0.0338       | 94.1                | 100.0                | 100.0   | 100.0   | 100.0   | 100.0   | –                        |
| 14:01                                 | 17         | 0.0065      | 17          | 0.0068       | 82.4                | 100.0                | 100.0   | 100.0   | 100.0   | 100.0   | –                        |
| 14:02                                 | 61         | 0.0232      | 60          | 0.0238       | 96.7                | 100.0                | 100.0   | 100.0   | 100.0   | 100.0   | –                        |
| 15:01                                 | 147        | 0.0559      | 160         | 0.0636       | 98.1                | 99.8                 | 100.0   | 99.8    | 97.5    | 100.0   | –                        |
| 15:17                                 | 10         | 0.0038      | 10          | 0.0040       | 100.0               | 100.0                | 100.0   | 100.0   | 100.0   | 100.0   | –                        |
| 15:18                                 | 5          | 0.0019      | 4           | 0.0016       | 100.0               | 100.0                | 75.0    | 100.0   | 100.0   | 100.0   | 15:01 (100)              |
| 18:01                                 | 140        | 0.0533      | 152         | 0.0604       | 93.4                | 99.6                 | 99.3    | 99.6    | 94.6    | 100.0   | 38:01 (100)              |
| 27:02                                 | 24         | 0.0091      | 23          | 0.0091       | 95.7                | 99.7                 | 72.7    | 100.0   | 100.0   | 99.8    | 27:05 (83)               |
| 27:05                                 | 98         | 0.0373      | 95          | 0.0378       | 96.8                | 99.8                 | 100.0   | 99.8    | 94.8    | 100.0   | –                        |
| 35:01                                 | 149        | 0.0567      | 125         | 0.0497       | 88.0                | 99.4                 | 95.5    | 99.6    | 91.3    | 99.8    | 35:02 (60)               |
| 35:02                                 | 24         | 0.0091      | 24          | 0.0095       | 83.3                | 99.9                 | 100.0   | 99.9    | 87.0    | 100.0   | –                        |
| 35:03                                 | 54         | 0.0205      | 61          | 0.0242       | 91.8                | 99.6                 | 82.1    | 100.0   | 100.0   | 99.6    | 35:01 (80)               |
| 35:08                                 | 19         | 0.0072      | 18          | 0.0072       | 55.6                | 99.9                 | 90.0    | 99.9    | 81.8    | 100.0   | 35:01 (100)              |

Continued on next page ...

Table S5 – continued from previous page

| Allele <sup>1</sup>                   | Num.<br>Train | Freq.<br>Train | Num.<br>Valid. | Freq.<br>Valid. | CR <sup>2</sup><br>(%) | ACC <sup>3</sup><br>(%) | SEN<br>(%) | SPE<br>(%) | PPV<br>(%) | NPV<br>(%) | Miscall <sup>4</sup><br>(%) |
|---------------------------------------|---------------|----------------|----------------|-----------------|------------------------|-------------------------|------------|------------|------------|------------|-----------------------------|
| 37:01                                 | 28            | 0.0107         | 26             | 0.0103          | 100.0                  | 100.0                   | 100.0      | 100.0      | 100.0      | 100.0      | –                           |
| 38:01                                 | 70            | 0.0266         | 74             | 0.0294          | 82.4                   | 100.0                   | 100.0      | 100.0      | 98.4       | 100.0      | –                           |
| 39:01                                 | 38            | 0.0145         | 35             | 0.0139          | 80.0                   | 99.9                    | 89.3       | 100.0      | 100.0      | 99.9       | 18:01 (67)                  |
| 39:06                                 | 12            | 0.0046         | 11             | 0.0044          | 63.6                   | 100.0                   | 100.0      | 100.0      | 100.0      | 100.0      | –                           |
| 39:24                                 | 2             | 0.0008         | 1              | 0.0004          | 100.0                  | 100.0                   | 100.0      | 100.0      | 100.0      | 100.0      | –                           |
| 40:01                                 | 105           | 0.0400         | 98             | 0.0390          | 98.0                   | 100.0                   | 100.0      | 100.0      | 100.0      | 100.0      | –                           |
| 40:02                                 | 42            | 0.0160         | 47             | 0.0187          | 87.2                   | 100.0                   | 100.0      | 100.0      | 100.0      | 100.0      | –                           |
| 40:06                                 | 3             | 0.0011         | 3              | 0.0012          | 66.7                   | 100.0                   | 100.0      | 100.0      | 100.0      | 100.0      | –                           |
| 41:01                                 | 12            | 0.0046         | 11             | 0.0044          | 90.9                   | 100.0                   | 100.0      | 100.0      | 100.0      | 100.0      | –                           |
| 41:02                                 | 17            | 0.0065         | 15             | 0.0060          | 93.3                   | 100.0                   | 100.0      | 100.0      | 100.0      | 100.0      | –                           |
| 44:02                                 | 226           | 0.0860         | 212            | 0.0843          | 99.1                   | 99.9                    | 99.0       | 100.0      | 99.5       | 99.9       | 44:03 (50)                  |
| 44:03                                 | 126           | 0.0479         | 126            | 0.0501          | 96.8                   | 99.9                    | 100.0      | 99.9       | 98.4       | 100.0      | –                           |
| 44:05                                 | 16            | 0.0061         | 13             | 0.0052          | 84.6                   | 99.9                    | 100.0      | 99.9       | 84.6       | 100.0      | –                           |
| 45:01                                 | 13            | 0.0049         | 12             | 0.0048          | 83.3                   | 100.0                   | 100.0      | 100.0      | 100.0      | 100.0      | –                           |
| 47:01                                 | 7             | 0.0027         | 7              | 0.0028          | 100.0                  | 100.0                   | 100.0      | 100.0      | 100.0      | 100.0      | –                           |
| 48:01                                 | 3             | 0.0011         | 2              | 0.0008          | 100.0                  | 100.0                   | 100.0      | 100.0      | 100.0      | 100.0      | –                           |
| 49:01                                 | 44            | 0.0167         | 44             | 0.0175          | 95.5                   | 99.9                    | 95.2       | 100.0      | 100.0      | 99.9       | 44:03 (50)                  |
| 50:01                                 | 37            | 0.0141         | 35             | 0.0139          | 91.4                   | 100.0                   | 100.0      | 100.0      | 97.0       | 100.0      | –                           |
| 51:01                                 | 154           | 0.0586         | 122            | 0.0485          | 97.5                   | 99.7                    | 99.2       | 99.7       | 95.2       | 100.0      | 44:05 (100)                 |
| 52:01                                 | 34            | 0.0129         | 31             | 0.0123          | 87.1                   | 100.0                   | 100.0      | 100.0      | 100.0      | 100.0      | –                           |
| 53:01                                 | 7             | 0.0027         | 6              | 0.0024          | 100.0                  | 100.0                   | 83.3       | 100.0      | 100.0      | 100.0      | 35:01 (100)                 |
| 55:01                                 | 42            | 0.0160         | 44             | 0.0175          | 95.5                   | 99.8                    | 92.9       | 100.0      | 97.5       | 99.9       | 56:01 (100)                 |
| 56:01                                 | 25            | 0.0095         | 21             | 0.0083          | 95.2                   | 99.8                    | 95.0       | 99.8       | 82.6       | 100.0      | 55:01 (100)                 |
| 57:01                                 | 76            | 0.0289         | 77             | 0.0306          | 97.4                   | 100.0                   | 100.0      | 100.0      | 100.0      | 100.0      | –                           |
| 58:01                                 | 25            | 0.0095         | 22             | 0.0087          | 95.5                   | 100.0                   | 100.0      | 100.0      | 100.0      | 100.0      | –                           |
| 73:01                                 | 3             | 0.0011         | 2              | 0.0008          | 100.0                  | 100.0                   | 100.0      | 100.0      | 100.0      | 100.0      | –                           |
| <i>HLA-C: Overall accuracy: 99.2%</i> |               |                |                |                 |                        |                         |            |            |            |            |                             |
| 01:02                                 | 85            | 0.0450         | 72             | 0.0390          | 98.6                   | 100.0                   | 100.0      | 100.0      | 100.0      | 100.0      | –                           |
| 02:02                                 | 115           | 0.0609         | 93             | 0.0504          | 100.0                  | 100.0                   | 100.0      | 100.0      | 100.0      | 100.0      | –                           |
| 03:02                                 | 4             | 0.0021         | 4              | 0.0022          | 100.0                  | 100.0                   | 100.0      | 100.0      | 100.0      | 100.0      | –                           |
| 03:03                                 | 90            | 0.0477         | 92             | 0.0499          | 91.3                   | 99.7                    | 97.6       | 99.8       | 95.3       | 99.9       | 03:04 (100)                 |
| 03:04                                 | 113           | 0.0599         | 106            | 0.0575          | 97.2                   | 99.7                    | 96.1       | 99.9       | 98.0       | 99.8       | 03:03 (100)                 |
| 04:01                                 | 221           | 0.1171         | 206            | 0.1117          | 99.5                   | 100.0                   | 100.0      | 100.0      | 100.0      | 100.0      | –                           |
| 05:01                                 | 143           | 0.0757         | 157            | 0.0851          | 99.4                   | 99.9                    | 99.4       | 99.9       | 99.4       | 99.9       | 08:02 (100)                 |
| 06:02                                 | 176           | 0.0932         | 174            | 0.0944          | 99.4                   | 99.9                    | 100.0      | 99.9       | 99.4       | 100.0      | –                           |
| 07:01                                 | 278           | 0.1472         | 273            | 0.1480          | 97.8                   | 100.0                   | 100.0      | 100.0      | 100.0      | 100.0      | –                           |
| 07:02                                 | 228           | 0.1208         | 257            | 0.1394          | 99.2                   | 100.0                   | 100.0      | 100.0      | 100.0      | 100.0      | –                           |
| 07:04                                 | 38            | 0.0201         | 37             | 0.0201          | 100.0                  | 100.0                   | 100.0      | 100.0      | 100.0      | 100.0      | –                           |
| 08:02                                 | 48            | 0.0254         | 49             | 0.0266          | 98.0                   | 99.9                    | 97.9       | 99.9       | 97.9       | 99.9       | 05:01 (100)                 |
| 08:03                                 | 2             | 0.0011         | 1              | 0.0005          | 100.0                  | 100.0                   | 100.0      | 100.0      | 100.0      | 100.0      | –                           |
| 12:02                                 | 26            | 0.0138         | 24             | 0.0130          | 95.8                   | 100.0                   | 100.0      | 100.0      | 100.0      | 100.0      | –                           |
| 12:03                                 | 134           | 0.0710         | 128            | 0.0694          | 99.2                   | 99.9                    | 99.2       | 100.0      | 100.0      | 99.9       | 06:02 (100)                 |
| 14:02                                 | 21            | 0.0111         | 21             | 0.0114          | 100.0                  | 100.0                   | 100.0      | 100.0      | 100.0      | 100.0      | –                           |
| 15:02                                 | 43            | 0.0228         | 45             | 0.0244          | 93.3                   | 99.9                    | 100.0      | 99.9       | 95.5       | 100.0      | –                           |
| 15:05                                 | 8             | 0.0042         | 8              | 0.0043          | 100.0                  | 100.0                   | 100.0      | 100.0      | 100.0      | 100.0      | –                           |
| 16:01                                 | 63            | 0.0334         | 62             | 0.0336          | 96.8                   | 99.9                    | 100.0      | 99.9       | 98.4       | 100.0      | –                           |

Continued on next page ...

Table S5 – continued from previous page

| Allele <sup>1</sup>                      | Num.<br>Train | Freq.<br>Train | Num.<br>Valid. | Freq.<br>Valid. | CR <sup>2</sup><br>(%) | ACC <sup>3</sup><br>(%) | SEN<br>(%) | SPE<br>(%) | PPV<br>(%) | NPV<br>(%) | Miscall <sup>4</sup><br>(%) |
|------------------------------------------|---------------|----------------|----------------|-----------------|------------------------|-------------------------|------------|------------|------------|------------|-----------------------------|
| 16:02                                    | 6             | 0.0032         | 5              | 0.0027          | 100.0                  | 100.0                   | 100.0      | 100.0      | 100.0      | 100.0      | –                           |
| 16:04                                    | 5             | 0.0026         | 4              | 0.0022          | 75.0                   | 99.9                    | 66.7       | 100.0      | 100.0      | 99.9       | 16:01 (100)                 |
| 17:01                                    | 22            | 0.0117         | 18             | 0.0098          | 94.4                   | 99.9                    | 100.0      | 99.9       | 89.5       | 100.0      | –                           |
| <i>HLA-DRB1: Overall accuracy: 94.9%</i> |               |                |                |                 |                        |                         |            |            |            |            |                             |
| 01:01                                    | 198           | 0.0802         | 208            | 0.0865          | 97.6                   | 99.4                    | 99.5       | 99.4       | 94.4       | 100.0      | 01:02 (100)                 |
| 01:02                                    | 33            | 0.0134         | 35             | 0.0146          | 97.1                   | 100.0                   | 100.0      | 100.0      | 97.1       | 100.0      | –                           |
| 01:03                                    | 18            | 0.0073         | 18             | 0.0075          | 83.3                   | 99.4                    | 20.0       | 100.0      | 100.0      | 99.5       | 01:01 (100)                 |
| 03:01                                    | 277           | 0.1122         | 277            | 0.1152          | 94.9                   | 99.9                    | 99.6       | 99.9       | 99.6       | 100.0      | 15:01 (100)                 |
| 04:01                                    | 179           | 0.0725         | 198            | 0.0824          | 91.9                   | 99.2                    | 97.3       | 99.3       | 93.2       | 99.8       | 04:07 (80)                  |
| 04:02                                    | 29            | 0.0118         | 28             | 0.0116          | 82.1                   | 99.9                    | 100.0      | 99.9       | 92.0       | 100.0      | –                           |
| 04:03                                    | 25            | 0.0101         | 31             | 0.0129          | 64.5                   | 99.2                    | 15.0       | 100.0      | 100.0      | 99.3       | 04:04 (65)                  |
| 04:04                                    | 74            | 0.0300         | 64             | 0.0266          | 85.9                   | 99.2                    | 94.5       | 99.3       | 78.2       | 99.9       | 04:01 (100)                 |
| 04:05                                    | 17            | 0.0069         | 19             | 0.0079          | 57.9                   | 100.0                   | 90.9       | 100.0      | 100.0      | 100.0      | 04:01 (100)                 |
| 04:07                                    | 25            | 0.0101         | 28             | 0.0116          | 71.4                   | 99.5                    | 70.0       | 99.8       | 77.8       | 99.7       | 04:01 (67)                  |
| 07:01                                    | 343           | 0.1390         | 300            | 0.1248          | 94.7                   | 99.9                    | 99.6       | 99.9       | 99.6       | 100.0      | 04:01 (100)                 |
| 08:01                                    | 65            | 0.0263         | 56             | 0.0233          | 98.2                   | 100.0                   | 100.0      | 100.0      | 99.1       | 100.0      | –                           |
| 08:03                                    | 4             | 0.0016         | 3              | 0.0012          | 66.7                   | 100.0                   | 100.0      | 100.0      | 100.0      | 100.0      | –                           |
| 08:04                                    | 5             | 0.0020         | 4              | 0.0017          | 50.0                   | 100.0                   | 100.0      | 100.0      | 100.0      | 100.0      | –                           |
| 09:01                                    | 26            | 0.0105         | 22             | 0.0092          | 90.9                   | 100.0                   | 100.0      | 100.0      | 100.0      | 100.0      | –                           |
| 10:01                                    | 16            | 0.0065         | 17             | 0.0071          | 82.4                   | 100.0                   | 100.0      | 100.0      | 100.0      | 100.0      | –                           |
| 11:01                                    | 165           | 0.0669         | 177            | 0.0736          | 75.7                   | 97.7                    | 99.3       | 97.6       | 73.5       | 100.0      | 12:01 (100)                 |
| 11:02                                    | 6             | 0.0024         | 6              | 0.0025          | 50.0                   | 100.0                   | 66.7       | 100.0      | 100.0      | 100.0      | 11:01 (100)                 |
| 11:04                                    | 110           | 0.0446         | 96             | 0.0399          | 78.1                   | 98.7                    | 62.7       | 100.0      | 100.0      | 98.8       | 11:01 (93)                  |
| 12:01                                    | 35            | 0.0142         | 39             | 0.0162          | 87.2                   | 99.9                    | 94.1       | 100.0      | 97.0       | 99.9       | 11:01 (100)                 |
| 12:02                                    | 2             | 0.0008         | 1              | 0.0004          | 100.0                  | 100.0                   | 100.0      | 100.0      | 100.0      | 100.0      | –                           |
| 13:01                                    | 170           | 0.0689         | 142            | 0.0591          | 95.1                   | 99.8                    | 98.5       | 99.9       | 98.5       | 99.9       | 13:02 (50)                  |
| 13:02                                    | 89            | 0.0361         | 87             | 0.0362          | 90.8                   | 100.0                   | 100.0      | 100.0      | 98.8       | 100.0      | –                           |
| 13:03                                    | 30            | 0.0122         | 31             | 0.0129          | 93.5                   | 100.0                   | 100.0      | 100.0      | 100.0      | 100.0      | –                           |
| 14:01                                    | 68            | 0.0276         | 67             | 0.0279          | 94.0                   | 99.8                    | 98.4       | 99.8       | 93.9       | 100.0      | 15:01 (100)                 |
| 15:01                                    | 294           | 0.1191         | 300            | 0.1248          | 96.0                   | 99.8                    | 99.7       | 99.8       | 99.0       | 100.0      | 03:01 (100)                 |
| 15:02                                    | 28            | 0.0113         | 28             | 0.0116          | 96.4                   | 100.0                   | 100.0      | 100.0      | 100.0      | 100.0      | –                           |
| 16:01                                    | 68            | 0.0276         | 68             | 0.0283          | 92.6                   | 99.9                    | 100.0      | 99.9       | 96.9       | 100.0      | –                           |
| 16:02                                    | 7             | 0.0028         | 7              | 0.0029          | 85.7                   | 100.0                   | 83.3       | 100.0      | 100.0      | 100.0      | 16:01 (100)                 |
| <i>HLA-DQA1: Overall accuracy: 97.8%</i> |               |                |                |                 |                        |                         |            |            |            |            |                             |
| 01:01                                    | 202           | 0.1156         | 185            | 0.1068          | 99.5                   | 99.7                    | 97.3       | 100.0      | 100.0      | 99.7       | 01:04 (80)                  |
| 01:02                                    | 351           | 0.2008         | 355            | 0.2050          | 98.0                   | 99.8                    | 99.7       | 99.9       | 99.4       | 99.9       | 01:03 (100)                 |
| 01:03                                    | 147           | 0.0841         | 138            | 0.0797          | 95.7                   | 99.8                    | 98.5       | 99.9       | 99.2       | 99.9       | 01:02 (100)                 |
| 01:04                                    | 30            | 0.0172         | 29             | 0.0167          | 96.6                   | 99.7                    | 100.0      | 99.7       | 84.8       | 100.0      | –                           |
| 01:05                                    | 6             | 0.0034         | 6              | 0.0035          | 66.7                   | 99.9                    | 100.0      | 99.9       | 88.9       | 100.0      | –                           |
| 02:01                                    | 237           | 0.1356         | 263            | 0.1518          | 98.9                   | 100.0                   | 100.0      | 100.0      | 100.0      | 100.0      | –                           |
| 03:01                                    | 164           | 0.0938         | 159            | 0.0918          | 98.1                   | 98.6                    | 94.2       | 99.1       | 91.3       | 99.4       | 03:03 (89)                  |
| 03:02                                    | 14            | 0.0080         | 14             | 0.0081          | 85.7                   | 100.0                   | 100.0      | 100.0      | 100.0      | 100.0      | –                           |
| 03:03                                    | 108           | 0.0618         | 108            | 0.0624          | 98.1                   | 98.7                    | 86.8       | 99.5       | 91.5       | 99.1       | 03:01 (100)                 |
| 04:01                                    | 54            | 0.0309         | 52             | 0.0300          | 94.2                   | 99.8                    | 100.0      | 99.8       | 94.2       | 100.0      | –                           |
| 05:01                                    | 194           | 0.1110         | 183            | 0.1057          | 100.0                  | 100.0                   | 100.0      | 100.0      | 100.0      | 100.0      | –                           |
| 05:05                                    | 227           | 0.1299         | 228            | 0.1316          | 98.7                   | 99.8                    | 100.0      | 99.7       | 98.3       | 100.0      | –                           |

Continued on next page ...

Table S5 – continued from previous page

| Allele <sup>1</sup>                      | Num.<br>Train | Freq.<br>Train | Num.<br>Valid. | Freq.<br>Valid. | CR <sup>2</sup><br>(%) | ACC <sup>3</sup><br>(%) | SEN<br>(%) | SPE<br>(%) | PPV<br>(%) | NPV<br>(%) | Miscall <sup>4</sup><br>(%) |
|------------------------------------------|---------------|----------------|----------------|-----------------|------------------------|-------------------------|------------|------------|------------|------------|-----------------------------|
| 06:01                                    | 5             | 0.0029         | 5              | 0.0029          | 80.0                   | 99.9                    | 50.0       | 100.0      | 100.0      | 99.9       | 04:01 (100)                 |
| <i>HLA-DQB1 Overall accuracy: 99.2%</i>  |               |                |                |                 |                        |                         |            |            |            |            |                             |
| 02:01                                    | 220           | 0.1136         | 204            | 0.1067          | 99.0                   | 100.0                   | 100.0      | 100.0      | 100.0      | 100.0      | –                           |
| 02:02                                    | 200           | 0.1033         | 200            | 0.1046          | 98.0                   | 99.9                    | 100.0      | 99.9       | 99.5       | 100.0      | –                           |
| 03:01                                    | 393           | 0.2030         | 384            | 0.2008          | 98.7                   | 99.7                    | 99.7       | 99.7       | 98.8       | 99.9       | 02:02 (100)                 |
| 03:02                                    | 187           | 0.0966         | 187            | 0.0978          | 98.9                   | 99.9                    | 100.0      | 99.9       | 98.9       | 100.0      | –                           |
| 03:03                                    | 84            | 0.0434         | 83             | 0.0434          | 94.0                   | 99.9                    | 98.7       | 100.0      | 100.0      | 99.9       | 03:01 (100)                 |
| 03:04                                    | 5             | 0.0026         | 5              | 0.0026          | 60.0                   | 99.9                    | 33.3       | 100.0      | 100.0      | 99.9       | 03:01 (100)                 |
| 03:19                                    | 2             | 0.0010         | 2              | 0.0010          | 100.0                  | 99.9                    | 50.0       | 100.0      | 100.0      | 99.9       | 03:01 (100)                 |
| 04:02                                    | 61            | 0.0315         | 60             | 0.0314          | 98.3                   | 100.0                   | 100.0      | 100.0      | 100.0      | 100.0      | –                           |
| 05:01                                    | 220           | 0.1136         | 213            | 0.1114          | 98.6                   | 99.9                    | 99.0       | 100.0      | 100.0      | 99.9       | 05:03 (100)                 |
| 05:02                                    | 67            | 0.0346         | 65             | 0.0340          | 98.5                   | 100.0                   | 100.0      | 100.0      | 100.0      | 100.0      | –                           |
| 05:03                                    | 55            | 0.0284         | 56             | 0.0293          | 100.0                  | 99.9                    | 100.0      | 99.9       | 96.6       | 100.0      | –                           |
| 06:01                                    | 24            | 0.0124         | 22             | 0.0115          | 95.5                   | 100.0                   | 100.0      | 100.0      | 100.0      | 100.0      | –                           |
| 06:02                                    | 234           | 0.1209         | 228            | 0.1192          | 97.8                   | 99.7                    | 99.6       | 99.8       | 98.4       | 99.9       | 06:04 (100)                 |
| 06:03                                    | 112           | 0.0579         | 132            | 0.0690          | 97.0                   | 99.8                    | 97.7       | 100.0      | 100.0      | 99.8       | 06:02 (100)                 |
| 06:04                                    | 52            | 0.0269         | 55             | 0.0288          | 94.5                   | 99.8                    | 98.1       | 99.9       | 96.2       | 99.9       | 03:01 (50)                  |
| 06:09                                    | 14            | 0.0072         | 13             | 0.0068          | 92.3                   | 99.9                    | 91.7       | 100.0      | 100.0      | 99.9       | 06:04 (100)                 |
| <i>HLA-DPB1: Overall accuracy: 94.8%</i> |               |                |                |                 |                        |                         |            |            |            |            |                             |
| 01:01                                    | 74            | 0.0451         | 77             | 0.0479          | 96.1                   | 100.0                   | 100.0      | 100.0      | 100.0      | 100.0      | –                           |
| 02:01                                    | 201           | 0.1226         | 233            | 0.1449          | 96.6                   | 98.0                    | 90.7       | 99.2       | 95.3       | 98.5       | 04:01 (95)                  |
| 03:01                                    | 133           | 0.0811         | 131            | 0.0815          | 93.9                   | 98.1                    | 99.2       | 98.0       | 80.8       | 99.9       | 104:01 (100)                |
| 04:01                                    | 713           | 0.4348         | 678            | 0.4216          | 98.5                   | 97.8                    | 99.7       | 96.3       | 95.3       | 99.8       | 02:01 (100)                 |
| 04:02                                    | 212           | 0.1293         | 201            | 0.1250          | 97.0                   | 99.5                    | 100.0      | 99.5       | 96.8       | 100.0      | –                           |
| 05:01                                    | 33            | 0.0201         | 32             | 0.0199          | 100.0                  | 100.0                   | 100.0      | 100.0      | 100.0      | 100.0      | –                           |
| 09:01                                    | 12            | 0.0073         | 10             | 0.0062          | 50.0                   | 99.9                    | 100.0      | 99.9       | 83.3       | 100.0      | –                           |
| 10:01                                    | 22            | 0.0134         | 24             | 0.0149          | 91.7                   | 99.9                    | 95.5       | 100.0      | 100.0      | 99.9       | 09:01 (100)                 |
| 11:01                                    | 29            | 0.0177         | 25             | 0.0155          | 88.0                   | 100.0                   | 100.0      | 100.0      | 100.0      | 100.0      | –                           |
| 13:01                                    | 38            | 0.0232         | 33             | 0.0205          | 87.9                   | 100.0                   | 100.0      | 100.0      | 100.0      | 100.0      | –                           |
| 14:01                                    | 20            | 0.0122         | 21             | 0.0131          | 66.7                   | 100.0                   | 100.0      | 100.0      | 100.0      | 100.0      | –                           |
| 15:01                                    | 16            | 0.0098         | 15             | 0.0093          | 100.0                  | 100.0                   | 100.0      | 100.0      | 100.0      | 100.0      | –                           |
| 16:01                                    | 7             | 0.0043         | 6              | 0.0037          | 100.0                  | 100.0                   | 100.0      | 100.0      | 100.0      | 100.0      | –                           |
| 17:01                                    | 29            | 0.0177         | 31             | 0.0193          | 93.5                   | 100.0                   | 100.0      | 100.0      | 100.0      | 100.0      | –                           |
| 19:01                                    | 8             | 0.0049         | 8              | 0.0050          | 100.0                  | 100.0                   | 100.0      | 100.0      | 100.0      | 100.0      | –                           |
| 104:01                                   | 24            | 0.0146         | 24             | 0.0149          | 87.5                   | 99.9                    | 100.0      | 99.9       | 91.3       | 100.0      | –                           |

<sup>1</sup>: the HLA alleles with more than one copy and non-zero sensitivity in the training are listed.

<sup>2</sup>: CR – call rate.

<sup>3</sup>: ACC – allele accuracy.

<sup>4</sup>: the most likely miscalled allele and the proportion of the most likely miscalled allele in all miscalled alleles.

Table S6: The sensitivity (SEN), specificity (SPE), positive predictive value (PPV) and negative predictive value (NPV) calculated from validation samples for each four-digit HLA allele with call threshold 0.5, when STUDY Data of Asian ancestry were divided to training and validation parts with equal sizes. The SNP markers in the intersect of Illumina platforms were used.

| Allele <sup>1</sup>                   | Num.<br>Train | Freq.<br>Train | Num.<br>Valid. | Freq.<br>Valid. | CR <sup>2</sup><br>(%) | ACC <sup>3</sup><br>(%) | SEN<br>(%) | SPE<br>(%) | PPV<br>(%) | NPV<br>(%) | Miscall <sup>4</sup><br>(%) |
|---------------------------------------|---------------|----------------|----------------|-----------------|------------------------|-------------------------|------------|------------|------------|------------|-----------------------------|
| <i>HLA-A: Overall accuracy: 93.8%</i> |               |                |                |                 |                        |                         |            |            |            |            |                             |
| 01:01                                 | 21            | 0.0331         | 21             | 0.0363          | 95.2                   | 100.0                   | 100.0      | 100.0      | 100.0      | 100.0      | –                           |
| 02:01                                 | 81            | 0.1278         | 65             | 0.1125          | 84.6                   | 97.4                    | 94.5       | 97.7       | 82.5       | 99.4       | 02:07 (67)                  |
| 02:05                                 | 2             | 0.0032         | 2              | 0.0035          | 100.0                  | 100.0                   | 100.0      | 100.0      | 100.0      | 100.0      | –                           |
| 02:06                                 | 39            | 0.0615         | 27             | 0.0467          | 92.6                   | 99.6                    | 100.0      | 99.6       | 92.6       | 100.0      | –                           |
| 02:07                                 | 31            | 0.0489         | 32             | 0.0554          | 81.2                   | 99.2                    | 92.3       | 99.6       | 92.3       | 99.6       | 02:01 (100)                 |
| 02:11                                 | 9             | 0.0142         | 8              | 0.0138          | 87.5                   | 100.0                   | 100.0      | 100.0      | 100.0      | 100.0      | –                           |
| 03:01                                 | 16            | 0.0252         | 13             | 0.0225          | 100.0                  | 100.0                   | 100.0      | 100.0      | 100.0      | 100.0      | –                           |
| 03:02                                 | 3             | 0.0047         | 2              | 0.0035          | 50.0                   | 100.0                   | 100.0      | 100.0      | 100.0      | 100.0      | –                           |
| 11:01                                 | 112           | 0.1767         | 120            | 0.2076          | 92.5                   | 99.6                    | 99.1       | 99.8       | 99.1       | 99.8       | 11:02 (100)                 |
| 11:02                                 | 10            | 0.0158         | 7              | 0.0121          | 85.7                   | 99.8                    | 100.0      | 99.8       | 85.7       | 100.0      | –                           |
| 24:02                                 | 102           | 0.1609         | 103            | 0.1782          | 94.2                   | 97.9                    | 100.0      | 97.5       | 89.8       | 100.0      | –                           |
| 26:01                                 | 23            | 0.0363         | 17             | 0.0294          | 100.0                  | 99.2                    | 100.0      | 99.2       | 81.0       | 100.0      | –                           |
| 29:01                                 | 2             | 0.0032         | 1              | 0.0017          | 100.0                  | 100.0                   | 100.0      | 100.0      | 100.0      | 100.0      | –                           |
| 30:01                                 | 22            | 0.0347         | 20             | 0.0346          | 100.0                  | 100.0                   | 100.0      | 100.0      | 100.0      | 100.0      | –                           |
| 30:04                                 | 4             | 0.0063         | 3              | 0.0052          | 100.0                  | 100.0                   | 100.0      | 100.0      | 100.0      | 100.0      | –                           |
| 31:01                                 | 24            | 0.0379         | 21             | 0.0363          | 100.0                  | 100.0                   | 100.0      | 100.0      | 100.0      | 100.0      | –                           |
| 32:01                                 | 8             | 0.0126         | 9              | 0.0156          | 88.9                   | 100.0                   | 100.0      | 100.0      | 100.0      | 100.0      | –                           |
| 33:03                                 | 58            | 0.0915         | 59             | 0.1021          | 98.3                   | 100.0                   | 100.0      | 100.0      | 100.0      | 100.0      | –                           |
| 34:01                                 | 9             | 0.0142         | 7              | 0.0121          | 85.7                   | 99.8                    | 100.0      | 99.8       | 85.7       | 100.0      | –                           |
| 68:01                                 | 10            | 0.0158         | 7              | 0.0121          | 85.7                   | 100.0                   | 100.0      | 100.0      | 100.0      | 100.0      | –                           |
| <i>HLA-B: Overall accuracy: 94.7%</i> |               |                |                |                 |                        |                         |            |            |            |            |                             |
| 07:02                                 | 22            | 0.0291         | 16             | 0.0239          | 93.8                   | 100.0                   | 100.0      | 100.0      | 100.0      | 100.0      | –                           |
| 07:05                                 | 12            | 0.0159         | 9              | 0.0134          | 88.9                   | 100.0                   | 100.0      | 100.0      | 100.0      | 100.0      | –                           |
| 08:01                                 | 11            | 0.0146         | 11             | 0.0164          | 90.9                   | 100.0                   | 100.0      | 100.0      | 100.0      | 100.0      | –                           |
| 13:01                                 | 27            | 0.0357         | 22             | 0.0328          | 77.3                   | 100.0                   | 100.0      | 100.0      | 100.0      | 100.0      | –                           |
| 13:02                                 | 27            | 0.0357         | 26             | 0.0388          | 84.6                   | 100.0                   | 100.0      | 100.0      | 100.0      | 100.0      | –                           |
| 14:01                                 | 4             | 0.0053         | 3              | 0.0045          | 66.7                   | 100.0                   | 100.0      | 100.0      | 100.0      | 100.0      | –                           |
| 15:01                                 | 24            | 0.0317         | 28             | 0.0418          | 46.4                   | 99.0                    | 92.3       | 99.2       | 75.0       | 99.8       | 46:01 (100)                 |
| 15:02                                 | 22            | 0.0291         | 19             | 0.0284          | 84.2                   | 99.8                    | 93.8       | 100.0      | 100.0      | 99.8       | 15:35 (100)                 |
| 15:17                                 | 3             | 0.0040         | 4              | 0.0060          | 50.0                   | 100.0                   | 100.0      | 100.0      | 100.0      | 100.0      | –                           |
| 15:18                                 | 10            | 0.0132         | 9              | 0.0134          | 77.8                   | 100.0                   | 100.0      | 100.0      | 100.0      | 100.0      | –                           |
| 15:35                                 | 6             | 0.0079         | 3              | 0.0045          | 100.0                  | 99.8                    | 100.0      | 99.8       | 75.0       | 100.0      | –                           |
| 18:01                                 | 8             | 0.0106         | 7              | 0.0104          | 42.9                   | 100.0                   | 100.0      | 100.0      | 100.0      | 100.0      | –                           |
| 27:04                                 | 8             | 0.0106         | 4              | 0.0060          | 100.0                  | 99.6                    | 100.0      | 99.6       | 66.7       | 100.0      | –                           |
| 27:05                                 | 9             | 0.0119         | 9              | 0.0134          | 66.7                   | 100.0                   | 100.0      | 100.0      | 100.0      | 100.0      | –                           |
| 35:01                                 | 27            | 0.0357         | 24             | 0.0358          | 70.8                   | 99.4                    | 100.0      | 99.4       | 85.0       | 100.0      | –                           |
| 35:03                                 | 17            | 0.0225         | 11             | 0.0164          | 54.5                   | 99.4                    | 50.0       | 100.0      | 100.0      | 99.6       | 35:01 (100)                 |
| 35:05                                 | 6             | 0.0079         | 6              | 0.0090          | 50.0                   | 100.0                   | 100.0      | 100.0      | 100.0      | 100.0      | –                           |
| 37:01                                 | 13            | 0.0172         | 10             | 0.0149          | 80.0                   | 100.0                   | 100.0      | 100.0      | 100.0      | 100.0      | –                           |
| 38:01                                 | 4             | 0.0053         | 3              | 0.0045          | 66.7                   | 100.0                   | 100.0      | 100.0      | 100.0      | 100.0      | –                           |

Continued on next page ...

Table S6 – continued from previous page

| Allele <sup>1</sup>                      | Num.<br>Train | Freq.<br>Train | Num.<br>Valid. | Freq.<br>Valid. | CR <sup>2</sup><br>(%) | ACC <sup>3</sup><br>(%) | SEN<br>(%) | SPE<br>(%) | PPV<br>(%) | NPV<br>(%) | Miscall <sup>4</sup><br>(%) |
|------------------------------------------|---------------|----------------|----------------|-----------------|------------------------|-------------------------|------------|------------|------------|------------|-----------------------------|
| 38:02                                    | 23            | 0.0304         | 17             | 0.0254          | 82.4                   | 99.2                    | 100.0      | 99.1       | 77.8       | 100.0      | –                           |
| 39:01                                    | 11            | 0.0146         | 13             | 0.0194          | 53.8                   | 99.4                    | 57.1       | 100.0      | 100.0      | 99.5       | 38:02 (100)                 |
| 40:01                                    | 61            | 0.0807         | 48             | 0.0716          | 85.4                   | 100.0                   | 100.0      | 100.0      | 100.0      | 100.0      | –                           |
| 40:02                                    | 22            | 0.0291         | 23             | 0.0343          | 65.2                   | 99.2                    | 86.7       | 99.6       | 86.7       | 99.7       | 40:06 (100)                 |
| 40:06                                    | 37            | 0.0489         | 34             | 0.0507          | 67.6                   | 99.0                    | 91.3       | 99.3       | 87.5       | 99.7       | 27:04 (100)                 |
| 44:02                                    | 7             | 0.0093         | 6              | 0.0090          | 66.7                   | 100.0                   | 100.0      | 100.0      | 100.0      | 100.0      | –                           |
| 44:03                                    | 29            | 0.0384         | 29             | 0.0433          | 89.7                   | 100.0                   | 100.0      | 100.0      | 100.0      | 100.0      | –                           |
| 46:01                                    | 46            | 0.0608         | 39             | 0.0582          | 84.6                   | 99.6                    | 97.0       | 99.8       | 97.0       | 99.8       | 40:02 (100)                 |
| 47:01                                    | 2             | 0.0026         | 1              | 0.0015          | 100.0                  | 100.0                   | 100.0      | 100.0      | 100.0      | 100.0      | –                           |
| 48:01                                    | 13            | 0.0172         | 14             | 0.0209          | 64.3                   | 99.8                    | 100.0      | 99.8       | 90.0       | 100.0      | –                           |
| 50:01                                    | 4             | 0.0053         | 5              | 0.0075          | 80.0                   | 100.0                   | 100.0      | 100.0      | 100.0      | 100.0      | –                           |
| 51:01                                    | 50            | 0.0661         | 56             | 0.0836          | 83.9                   | 99.2                    | 95.7       | 99.5       | 95.7       | 99.7       | 51:02 (100)                 |
| 51:02                                    | 4             | 0.0053         | 4              | 0.0060          | 75.0                   | 99.4                    | 66.7       | 99.6       | 50.0       | 99.8       | 51:01 (100)                 |
| 51:06                                    | 3             | 0.0040         | 4              | 0.0060          | 75.0                   | 100.0                   | 100.0      | 100.0      | 100.0      | 100.0      | –                           |
| 52:01                                    | 31            | 0.0410         | 22             | 0.0328          | 68.2                   | 99.8                    | 93.3       | 100.0      | 100.0      | 99.8       | 51:01 (100)                 |
| 54:01                                    | 27            | 0.0357         | 22             | 0.0328          | 72.7                   | 99.4                    | 93.8       | 99.6       | 88.2       | 99.8       | 55:02 (100)                 |
| 57:01                                    | 10            | 0.0132         | 9              | 0.0134          | 88.9                   | 100.0                   | 100.0      | 100.0      | 100.0      | 100.0      | –                           |
| 58:01                                    | 35            | 0.0463         | 41             | 0.0612          | 90.2                   | 100.0                   | 100.0      | 100.0      | 100.0      | 100.0      | –                           |
| 67:01                                    | 4             | 0.0053         | 3              | 0.0045          | 66.7                   | 99.8                    | 50.0       | 100.0      | 100.0      | 99.9       | 38:02 (100)                 |
| <i>HLA-C: Overall accuracy: 97.8%</i>    |               |                |                |                 |                        |                         |            |            |            |            |                             |
| 01:02                                    | 83            | 0.1305         | 73             | 0.1246          | 95.9                   | 99.1                    | 98.6       | 99.2       | 94.5       | 99.8       | 04:01 (50)                  |
| 02:02                                    | 5             | 0.0079         | 4              | 0.0068          | 100.0                  | 100.0                   | 100.0      | 100.0      | 100.0      | 100.0      | –                           |
| 03:02                                    | 33            | 0.0519         | 29             | 0.0495          | 96.6                   | 100.0                   | 100.0      | 100.0      | 100.0      | 100.0      | –                           |
| 03:03                                    | 50            | 0.0786         | 38             | 0.0648          | 97.4                   | 99.5                    | 97.3       | 99.6       | 94.7       | 99.8       | 03:04 (100)                 |
| 03:04                                    | 50            | 0.0786         | 53             | 0.0904          | 98.1                   | 99.5                    | 96.2       | 99.8       | 98.0       | 99.6       | 03:03 (100)                 |
| 04:01                                    | 37            | 0.0582         | 32             | 0.0546          | 87.5                   | 99.8                    | 100.0      | 99.8       | 96.6       | 100.0      | –                           |
| 04:03                                    | 6             | 0.0094         | 5              | 0.0085          | 80.0                   | 99.8                    | 100.0      | 99.8       | 80.0       | 100.0      | –                           |
| 05:01                                    | 6             | 0.0094         | 6              | 0.0102          | 83.3                   | 100.0                   | 100.0      | 100.0      | 100.0      | 100.0      | –                           |
| 06:02                                    | 46            | 0.0723         | 45             | 0.0768          | 97.8                   | 100.0                   | 100.0      | 100.0      | 100.0      | 100.0      | –                           |
| 07:01                                    | 17            | 0.0267         | 14             | 0.0239          | 92.9                   | 100.0                   | 100.0      | 100.0      | 100.0      | 100.0      | –                           |
| 07:02                                    | 97            | 0.1525         | 104            | 0.1775          | 97.1                   | 99.8                    | 99.0       | 100.0      | 100.0      | 99.8       | 04:01 (50)                  |
| 07:04                                    | 7             | 0.0110         | 6              | 0.0102          | 66.7                   | 100.0                   | 100.0      | 100.0      | 100.0      | 100.0      | –                           |
| 08:01                                    | 53            | 0.0833         | 50             | 0.0853          | 90.0                   | 99.6                    | 100.0      | 99.6       | 95.7       | 100.0      | –                           |
| 08:02                                    | 5             | 0.0079         | 5              | 0.0085          | 80.0                   | 100.0                   | 100.0      | 100.0      | 100.0      | 100.0      | –                           |
| 12:02                                    | 26            | 0.0409         | 25             | 0.0427          | 88.0                   | 100.0                   | 100.0      | 100.0      | 100.0      | 100.0      | –                           |
| 12:03                                    | 14            | 0.0220         | 11             | 0.0188          | 90.9                   | 100.0                   | 100.0      | 100.0      | 100.0      | 100.0      | –                           |
| 12:04                                    | 3             | 0.0047         | 3              | 0.0051          | 100.0                  | 100.0                   | 100.0      | 100.0      | 100.0      | 100.0      | –                           |
| 14:02                                    | 35            | 0.0550         | 32             | 0.0546          | 96.9                   | 100.0                   | 100.0      | 100.0      | 100.0      | 100.0      | –                           |
| 14:03                                    | 12            | 0.0189         | 13             | 0.0222          | 92.3                   | 100.0                   | 100.0      | 100.0      | 100.0      | 100.0      | –                           |
| 15:02                                    | 30            | 0.0472         | 30             | 0.0512          | 93.3                   | 99.8                    | 100.0      | 99.8       | 96.6       | 100.0      | –                           |
| <i>HLA-DRB1: Overall accuracy: 95.8%</i> |               |                |                |                 |                        |                         |            |            |            |            |                             |
| 01:01                                    | 12            | 0.0165         | 14             | 0.0210          | 64.3                   | 100.0                   | 100.0      | 100.0      | 100.0      | 100.0      | –                           |
| 03:01                                    | 40            | 0.0551         | 34             | 0.0511          | 82.4                   | 100.0                   | 100.0      | 100.0      | 100.0      | 100.0      | –                           |
| 04:01                                    | 7             | 0.0096         | 7              | 0.0105          | 57.1                   | 100.0                   | 100.0      | 100.0      | 100.0      | 100.0      | –                           |
| 04:03                                    | 21            | 0.0289         | 20             | 0.0300          | 10.0                   | 99.8                    | 100.0      | 99.8       | 66.7       | 100.0      | –                           |
| 04:04                                    | 7             | 0.0096         | 6              | 0.0090          | 16.7                   | 100.0                   | 100.0      | 100.0      | 100.0      | 100.0      | –                           |

Continued on next page ...

Table S6 – continued from previous page

| Allele <sup>1</sup>                      | Num.<br>Train | Freq.<br>Train | Num.<br>Valid. | Freq.<br>Valid. | CR <sup>2</sup><br>(%) | ACC <sup>3</sup><br>(%) | SEN<br>(%) | SPE<br>(%) | PPV<br>(%) | NPV<br>(%) | Miscall <sup>4</sup><br>(%) |
|------------------------------------------|---------------|----------------|----------------|-----------------|------------------------|-------------------------|------------|------------|------------|------------|-----------------------------|
| 04:05                                    | 42            | 0.0579         | 34             | 0.0511          | 70.6                   | 99.6                    | 91.7       | 100.0      | 100.0      | 99.7       | 04:10 (50)                  |
| 04:06                                    | 17            | 0.0234         | 13             | 0.0195          | 30.8                   | 100.0                   | 100.0      | 100.0      | 100.0      | 100.0      | –                           |
| 04:10                                    | 5             | 0.0069         | 4              | 0.0060          | 25.0                   | 99.8                    | 100.0      | 99.8       | 50.0       | 100.0      | –                           |
| 07:01                                    | 65            | 0.0895         | 61             | 0.0916          | 83.6                   | 100.0                   | 100.0      | 100.0      | 100.0      | 100.0      | –                           |
| 08:02                                    | 10            | 0.0138         | 7              | 0.0105          | 85.7                   | 99.6                    | 100.0      | 99.6       | 75.0       | 100.0      | –                           |
| 08:03                                    | 36            | 0.0496         | 36             | 0.0541          | 69.4                   | 99.8                    | 100.0      | 99.8       | 96.2       | 100.0      | –                           |
| 09:01                                    | 86            | 0.1185         | 65             | 0.0976          | 90.8                   | 100.0                   | 100.0      | 100.0      | 100.0      | 100.0      | –                           |
| 10:01                                    | 16            | 0.0220         | 18             | 0.0270          | 66.7                   | 100.0                   | 100.0      | 100.0      | 100.0      | 100.0      | –                           |
| 11:01                                    | 35            | 0.0482         | 27             | 0.0405          | 70.4                   | 99.1                    | 100.0      | 99.1       | 82.6       | 100.0      | –                           |
| 12:01                                    | 22            | 0.0303         | 26             | 0.0390          | 57.7                   | 99.4                    | 80.0       | 100.0      | 100.0      | 99.5       | 11:01 (67)                  |
| 12:02                                    | 40            | 0.0551         | 53             | 0.0796          | 88.7                   | 99.8                    | 100.0      | 99.8       | 97.9       | 100.0      | –                           |
| 13:01                                    | 16            | 0.0220         | 13             | 0.0195          | 69.2                   | 100.0                   | 100.0      | 100.0      | 100.0      | 100.0      | –                           |
| 13:02                                    | 31            | 0.0427         | 28             | 0.0420          | 78.6                   | 100.0                   | 100.0      | 100.0      | 100.0      | 100.0      | –                           |
| 13:12                                    | 3             | 0.0041         | 2              | 0.0030          | 50.0                   | 100.0                   | 100.0      | 100.0      | 100.0      | 100.0      | –                           |
| 14:01                                    | 12            | 0.0165         | 15             | 0.0225          | 20.0                   | 99.4                    | 33.3       | 99.8       | 50.0       | 99.7       | 14:04 (100)                 |
| 14:03                                    | 6             | 0.0083         | 5              | 0.0075          | 100.0                  | 99.8                    | 80.0       | 100.0      | 100.0      | 99.8       | 11:01 (100)                 |
| 14:04                                    | 15            | 0.0207         | 14             | 0.0210          | 64.3                   | 99.4                    | 100.0      | 99.3       | 75.0       | 100.0      | –                           |
| 14:05                                    | 15            | 0.0207         | 15             | 0.0225          | 46.7                   | 99.8                    | 85.7       | 100.0      | 100.0      | 99.8       | 14:04 (100)                 |
| 15:01                                    | 70            | 0.0964         | 66             | 0.0991          | 77.3                   | 99.8                    | 98.0       | 100.0      | 100.0      | 99.8       | 16:02 (100)                 |
| 15:02                                    | 48            | 0.0661         | 50             | 0.0751          | 82.0                   | 100.0                   | 100.0      | 100.0      | 100.0      | 100.0      | –                           |
| 16:02                                    | 12            | 0.0165         | 13             | 0.0195          | 46.2                   | 99.8                    | 100.0      | 99.8       | 85.7       | 100.0      | –                           |
| <i>HLA-DQA1: Overall accuracy: 90.0%</i> |               |                |                |                 |                        |                         |            |            |            |            |                             |
| 01:01                                    | 34            | 0.0570         | 31             | 0.0542          | 83.9                   | 98.7                    | 76.9       | 100.0      | 100.0      | 98.9       | 01:04 (83)                  |
| 01:02                                    | 109           | 0.1829         | 106            | 0.1853          | 85.8                   | 98.9                    | 96.7       | 99.5       | 97.8       | 99.4       | 01:03 (67)                  |
| 01:03                                    | 73            | 0.1225         | 77             | 0.1346          | 87.0                   | 99.4                    | 98.5       | 99.5       | 97.1       | 99.8       | 01:02 (100)                 |
| 01:04                                    | 28            | 0.0470         | 24             | 0.0420          | 58.3                   | 98.9                    | 100.0      | 98.9       | 73.7       | 100.0      | –                           |
| 01:05                                    | 8             | 0.0134         | 8              | 0.0140          | 75.0                   | 100.0                   | 100.0      | 100.0      | 100.0      | 100.0      | –                           |
| 02:01                                    | 54            | 0.0906         | 55             | 0.0962          | 94.5                   | 100.0                   | 100.0      | 100.0      | 100.0      | 100.0      | –                           |
| 03:01                                    | 83            | 0.1393         | 68             | 0.1189          | 76.5                   | 95.3                    | 61.5       | 99.5       | 94.1       | 96.3       | 03:02 (56)                  |
| 03:02                                    | 50            | 0.0839         | 55             | 0.0962          | 65.5                   | 97.4                    | 97.2       | 97.4       | 75.7       | 99.8       | 03:03 (100)                 |
| 03:03                                    | 28            | 0.0470         | 27             | 0.0472          | 59.3                   | 97.4                    | 87.5       | 97.8       | 58.9       | 99.6       | 03:01 (100)                 |
| 04:01                                    | 9             | 0.0151         | 7              | 0.0122          | 100.0                  | 100.0                   | 100.0      | 100.0      | 100.0      | 100.0      | –                           |
| 05:01                                    | 34            | 0.0570         | 27             | 0.0472          | 92.6                   | 98.9                    | 80.0       | 100.0      | 100.0      | 99.1       | 05:05 (80)                  |
| 05:03                                    | 6             | 0.0101         | 5              | 0.0087          | 20.0                   | 99.8                    | 100.0      | 99.8       | 50.0       | 100.0      | –                           |
| 05:05                                    | 29            | 0.0487         | 28             | 0.0490          | 85.7                   | 98.7                    | 100.0      | 98.6       | 80.0       | 100.0      | –                           |
| 05:08                                    | 7             | 0.0117         | 6              | 0.0105          | 83.3                   | 99.8                    | 80.0       | 100.0      | 100.0      | 99.8       | 05:05 (100)                 |
| 06:01                                    | 39            | 0.0654         | 45             | 0.0787          | 91.1                   | 99.8                    | 100.0      | 99.8       | 97.6       | 100.0      | –                           |
| <i>HLA-DQB1 Overall accuracy: 98.1%</i>  |               |                |                |                 |                        |                         |            |            |            |            |                             |
| 02:01                                    | 25            | 0.0399         | 27             | 0.0452          | 100.0                  | 100.0                   | 100.0      | 100.0      | 100.0      | 100.0      | –                           |
| 02:02                                    | 44            | 0.0703         | 38             | 0.0635          | 100.0                  | 99.8                    | 97.4       | 100.0      | 100.0      | 99.8       | 03:03 (100)                 |
| 03:01                                    | 111           | 0.1773         | 104            | 0.1739          | 99.0                   | 98.6                    | 98.1       | 98.7       | 94.4       | 99.6       | 03:03 (100)                 |
| 03:02                                    | 45            | 0.0719         | 50             | 0.0836          | 92.0                   | 100.0                   | 100.0      | 100.0      | 100.0      | 100.0      | –                           |
| 03:03                                    | 83            | 0.1326         | 86             | 0.1438          | 96.5                   | 99.0                    | 96.4       | 99.4       | 96.4       | 99.4       | 03:01 (100)                 |
| 04:01                                    | 32            | 0.0511         | 26             | 0.0435          | 96.2                   | 99.7                    | 96.0       | 99.8       | 96.0       | 99.8       | 04:02 (100)                 |
| 04:02                                    | 13            | 0.0208         | 12             | 0.0201          | 100.0                  | 99.7                    | 91.7       | 99.8       | 91.7       | 99.8       | 04:01 (100)                 |
| 05:01                                    | 36            | 0.0575         | 34             | 0.0569          | 100.0                  | 100.0                   | 100.0      | 100.0      | 100.0      | 100.0      | –                           |

Continued on next page ...



Table S6 – continued from previous page

| Allele <sup>1</sup>                      | Num.<br>Train | Freq.<br>Train | Num.<br>Valid. | Freq.<br>Valid. | CR <sup>2</sup><br>(%) | ACC <sup>3</sup><br>(%) | SEN<br>(%) | SPE<br>(%) | PPV<br>(%) | NPV<br>(%) | Miscall <sup>4</sup><br>(%) |
|------------------------------------------|---------------|----------------|----------------|-----------------|------------------------|-------------------------|------------|------------|------------|------------|-----------------------------|
| 05:02                                    | 44            | 0.0703         | 38             | 0.0635          | 100.0                  | 99.5                    | 92.1       | 100.0      | 100.0      | 99.5       | 03:01 (100)                 |
| 05:03                                    | 31            | 0.0495         | 35             | 0.0585          | 100.0                  | 100.0                   | 100.0      | 100.0      | 100.0      | 100.0      | –                           |
| 06:01                                    | 74            | 0.1182         | 78             | 0.1304          | 94.9                   | 100.0                   | 100.0      | 100.0      | 100.0      | 100.0      | –                           |
| 06:02                                    | 43            | 0.0687         | 34             | 0.0569          | 97.1                   | 100.0                   | 100.0      | 100.0      | 100.0      | 100.0      | –                           |
| 06:03                                    | 12            | 0.0192         | 12             | 0.0201          | 58.3                   | 100.0                   | 100.0      | 100.0      | 100.0      | 100.0      | –                           |
| 06:04                                    | 18            | 0.0288         | 13             | 0.0217          | 84.6                   | 100.0                   | 100.0      | 100.0      | 100.0      | 100.0      | –                           |
| 06:09                                    | 11            | 0.0176         | 11             | 0.0184          | 90.9                   | 100.0                   | 100.0      | 100.0      | 100.0      | 100.0      | –                           |
| <i>HLA-DPB1: Overall accuracy: 95.3%</i> |               |                |                |                 |                        |                         |            |            |            |            |                             |
| 01:01                                    | 18            | 0.0332         | 15             | 0.0293          | 80.0                   | 99.8                    | 91.7       | 100.0      | 100.0      | 99.8       | 26:01 (100)                 |
| 02:01                                    | 109           | 0.2011         | 113            | 0.2207          | 85.0                   | 97.6                    | 96.9       | 97.9       | 93.0       | 99.3       | 04:01 (67)                  |
| 02:02                                    | 21            | 0.0387         | 24             | 0.0469          | 66.7                   | 98.3                    | 62.5       | 99.8       | 90.9       | 98.8       | 02:01 (100)                 |
| 03:01                                    | 16            | 0.0295         | 13             | 0.0254          | 30.8                   | 99.5                    | 100.0      | 99.5       | 66.7       | 100.0      | –                           |
| 04:01                                    | 78            | 0.1439         | 66             | 0.1289          | 93.9                   | 99.1                    | 96.8       | 99.4       | 96.8       | 99.6       | 02:01 (50)                  |
| 04:02                                    | 25            | 0.0461         | 29             | 0.0566          | 93.1                   | 99.3                    | 100.0      | 99.2       | 90.0       | 100.0      | –                           |
| 05:01                                    | 165           | 0.3044         | 154            | 0.3008          | 88.3                   | 99.3                    | 99.3       | 99.3       | 98.5       | 99.7       | 14:01 (100)                 |
| 09:01                                    | 10            | 0.0185         | 12             | 0.0234          | 91.7                   | 100.0                   | 100.0      | 100.0      | 100.0      | 100.0      | –                           |
| 09:02                                    | 10            | 0.0185         | 8              | 0.0156          | 62.5                   | 99.3                    | 60.0       | 99.8       | 75.0       | 99.6       | 05:01 (50)                  |
| 13:01                                    | 21            | 0.0387         | 20             | 0.0391          | 80.0                   | 99.5                    | 93.8       | 99.8       | 93.8       | 99.8       | 09:02 (100)                 |
| 14:01                                    | 16            | 0.0295         | 18             | 0.0352          | 77.8                   | 99.8                    | 100.0      | 99.8       | 93.3       | 100.0      | –                           |
| 17:01                                    | 15            | 0.0277         | 14             | 0.0273          | 92.9                   | 100.0                   | 100.0      | 100.0      | 100.0      | 100.0      | –                           |
| 26:01                                    | 7             | 0.0129         | 6              | 0.0117          | 50.0                   | 99.8                    | 100.0      | 99.8       | 75.0       | 100.0      | –                           |
| 104:01                                   | 11            | 0.0203         | 9              | 0.0176          | 44.4                   | 99.5                    | 50.0       | 100.0      | 100.0      | 99.6       | 03:01 (100)                 |

<sup>1</sup>: the HLA alleles with more than one copy and non-zero sensitivity in the training are listed.

<sup>2</sup>: CR – call rate.

<sup>3</sup>: ACC – allele accuracy.

<sup>4</sup>: the most likely miscalled allele and the proportion of the most likely miscalled allele in all miscalled alleles.

Table S7: The sensitivity (SEN), specificity (SPE), positive predictive value (PPV) and negative predictive value (NPV) calculated from validation samples for each four-digit HLA allele with call threshold 0.5, when STUDY Data of Hispanic ancestry were divided to training and validation parts with equal sizes. The SNP markers in the intersect of Illumina platforms were used.

| Allele <sup>1</sup>                   | Num.<br>Train | Freq.<br>Train | Num.<br>Valid. | Freq.<br>Valid. | CR <sup>2</sup><br>(%) | ACC <sup>3</sup><br>(%) | SEN<br>(%) | SPE<br>(%) | PPV<br>(%) | NPV<br>(%) | Miscall <sup>4</sup><br>(%) |
|---------------------------------------|---------------|----------------|----------------|-----------------|------------------------|-------------------------|------------|------------|------------|------------|-----------------------------|
| <i>HLA-A: Overall accuracy: 96.0%</i> |               |                |                |                 |                        |                         |            |            |            |            |                             |
| 01:01                                 | 22            | 0.0683         | 17             | 0.0620          | 100.0                  | 100.0                   | 100.0      | 100.0      | 100.0      | 100.0      | –                           |
| 02:01                                 | 78            | 0.2422         | 75             | 0.2737          | 84.0                   | 98.2                    | 100.0      | 97.5       | 94.0       | 100.0      | –                           |
| 02:05                                 | 2             | 0.0062         | 2              | 0.0073          | 50.0                   | 100.0                   | 100.0      | 100.0      | 100.0      | 100.0      | –                           |
| 02:06                                 | 4             | 0.0124         | 5              | 0.0182          | 40.0                   | 100.0                   | 100.0      | 100.0      | 100.0      | 100.0      | –                           |
| 03:01                                 | 21            | 0.0652         | 15             | 0.0547          | 100.0                  | 100.0                   | 100.0      | 100.0      | 100.0      | 100.0      | –                           |
| 11:01                                 | 14            | 0.0435         | 12             | 0.0438          | 83.3                   | 100.0                   | 100.0      | 100.0      | 100.0      | 100.0      | –                           |
| 23:01                                 | 13            | 0.0404         | 9              | 0.0328          | 88.9                   | 100.0                   | 100.0      | 100.0      | 100.0      | 100.0      | –                           |
| 24:02                                 | 33            | 0.1025         | 26             | 0.0949          | 80.8                   | 100.0                   | 100.0      | 100.0      | 100.0      | 100.0      | –                           |
| 26:01                                 | 13            | 0.0404         | 13             | 0.0474          | 84.6                   | 99.1                    | 100.0      | 99.1       | 84.6       | 100.0      | –                           |
| 29:02                                 | 17            | 0.0528         | 14             | 0.0511          | 100.0                  | 100.0                   | 100.0      | 100.0      | 100.0      | 100.0      | –                           |
| 30:01                                 | 6             | 0.0186         | 4              | 0.0146          | 75.0                   | 100.0                   | 100.0      | 100.0      | 100.0      | 100.0      | –                           |
| 30:02                                 | 5             | 0.0155         | 5              | 0.0182          | 60.0                   | 100.0                   | 100.0      | 100.0      | 100.0      | 100.0      | –                           |
| 30:04                                 | 2             | 0.0062         | 2              | 0.0073          | 100.0                  | 100.0                   | 100.0      | 100.0      | 100.0      | 100.0      | –                           |
| 31:01                                 | 20            | 0.0621         | 24             | 0.0876          | 91.7                   | 100.0                   | 100.0      | 100.0      | 100.0      | 100.0      | –                           |
| 32:01                                 | 6             | 0.0186         | 5              | 0.0182          | 80.0                   | 100.0                   | 100.0      | 100.0      | 100.0      | 100.0      | –                           |
| 33:01                                 | 4             | 0.0124         | 4              | 0.0146          | 75.0                   | 100.0                   | 100.0      | 100.0      | 100.0      | 100.0      | –                           |
| 68:01                                 | 18            | 0.0559         | 20             | 0.0730          | 70.0                   | 98.7                    | 92.9       | 99.1       | 86.7       | 99.6       | 68:17 (100)                 |
| 68:02                                 | 4             | 0.0124         | 3              | 0.0109          | 100.0                  | 100.0                   | 100.0      | 100.0      | 100.0      | 100.0      | –                           |
| 68:17                                 | 4             | 0.0124         | 4              | 0.0146          | 25.0                   | 99.6                    | 100.0      | 99.6       | 50.0       | 100.0      | –                           |
| <i>HLA-B: Overall accuracy: 93.8%</i> |               |                |                |                 |                        |                         |            |            |            |            |                             |
| 07:02                                 | 14            | 0.0294         | 16             | 0.0417          | 68.8                   | 100.0                   | 100.0      | 100.0      | 100.0      | 100.0      | –                           |
| 08:01                                 | 17            | 0.0357         | 12             | 0.0312          | 91.7                   | 100.0                   | 100.0      | 100.0      | 100.0      | 100.0      | –                           |
| 13:02                                 | 5             | 0.0105         | 10             | 0.0260          | 40.0                   | 100.0                   | 100.0      | 100.0      | 100.0      | 100.0      | –                           |
| 14:01                                 | 4             | 0.0084         | 3              | 0.0078          | 66.7                   | 100.0                   | 100.0      | 100.0      | 100.0      | 100.0      | –                           |
| 14:02                                 | 7             | 0.0147         | 9              | 0.0234          | 44.4                   | 100.0                   | 100.0      | 100.0      | 100.0      | 100.0      | –                           |
| 15:01                                 | 14            | 0.0294         | 9              | 0.0234          | 33.3                   | 98.6                    | 66.7       | 99.3       | 66.7       | 99.7       | 35:43 (100)                 |
| 15:04                                 | 12            | 0.0252         | 14             | 0.0365          | 35.7                   | 100.0                   | 100.0      | 100.0      | 100.0      | 100.0      | –                           |
| 18:01                                 | 20            | 0.0420         | 15             | 0.0391          | 46.7                   | 100.0                   | 100.0      | 100.0      | 100.0      | 100.0      | –                           |
| 27:05                                 | 5             | 0.0105         | 3              | 0.0078          | 66.7                   | 100.0                   | 100.0      | 100.0      | 100.0      | 100.0      | –                           |
| 35:02                                 | 5             | 0.0105         | 4              | 0.0104          | 75.0                   | 100.0                   | 100.0      | 100.0      | 100.0      | 100.0      | –                           |
| 35:05                                 | 11            | 0.0231         | 11             | 0.0286          | 18.2                   | 100.0                   | 100.0      | 100.0      | 100.0      | 100.0      | –                           |
| 35:19                                 | 4             | 0.0084         | 2              | 0.0052          | 50.0                   | 100.0                   | 100.0      | 100.0      | 100.0      | 100.0      | –                           |
| 35:43                                 | 8             | 0.0168         | 5              | 0.0130          | 40.0                   | 98.6                    | 100.0      | 98.6       | 50.0       | 100.0      | –                           |
| 37:01                                 | 2             | 0.0042         | 3              | 0.0078          | 33.3                   | 100.0                   | 100.0      | 100.0      | 100.0      | 100.0      | –                           |
| 38:01                                 | 9             | 0.0189         | 7              | 0.0182          | 57.1                   | 100.0                   | 100.0      | 100.0      | 100.0      | 100.0      | –                           |
| 39:06                                 | 7             | 0.0147         | 3              | 0.0078          | 33.3                   | 100.0                   | 100.0      | 100.0      | 100.0      | 100.0      | –                           |
| 39:09                                 | 11            | 0.0231         | 6              | 0.0156          | 50.0                   | 100.0                   | 100.0      | 100.0      | 100.0      | 100.0      | –                           |
| 40:01                                 | 9             | 0.0189         | 5              | 0.0130          | 20.0                   | 99.3                    | 100.0      | 99.3       | 50.0       | 100.0      | –                           |
| 41:01                                 | 3             | 0.0063         | 2              | 0.0052          | 50.0                   | 100.0                   | 100.0      | 100.0      | 100.0      | 100.0      | –                           |
| 42:01                                 | 2             | 0.0042         | 1              | 0.0026          | 100.0                  | 100.0                   | 100.0      | 100.0      | 100.0      | 100.0      | –                           |

Continued on next page ...

Table S7 – continued from previous page

| Allele <sup>1</sup>                      | Num.<br>Train | Freq.<br>Train | Num.<br>Valid. | Freq.<br>Valid. | CR <sup>2</sup><br>(%) | ACC <sup>3</sup><br>(%) | SEN<br>(%) | SPE<br>(%) | PPV<br>(%) | NPV<br>(%) | Miscall <sup>4</sup><br>(%) |
|------------------------------------------|---------------|----------------|----------------|-----------------|------------------------|-------------------------|------------|------------|------------|------------|-----------------------------|
| 44:02                                    | 10            | 0.0210         | 12             | 0.0312          | 50.0                   | 99.3                    | 83.3       | 100.0      | 100.0      | 99.7       | 40:01 (100)                 |
| 44:03                                    | 36            | 0.0756         | 22             | 0.0573          | 77.3                   | 100.0                   | 100.0      | 100.0      | 100.0      | 100.0      | –                           |
| 48:01                                    | 19            | 0.0399         | 16             | 0.0417          | 50.0                   | 100.0                   | 100.0      | 100.0      | 100.0      | 100.0      | –                           |
| 49:01                                    | 11            | 0.0231         | 11             | 0.0286          | 54.5                   | 100.0                   | 100.0      | 100.0      | 100.0      | 100.0      | –                           |
| 50:01                                    | 5             | 0.0105         | 5              | 0.0130          | 60.0                   | 100.0                   | 100.0      | 100.0      | 100.0      | 100.0      | –                           |
| 51:01                                    | 37            | 0.0777         | 27             | 0.0703          | 48.1                   | 99.3                    | 100.0      | 99.2       | 92.9       | 100.0      | –                           |
| 52:01                                    | 11            | 0.0231         | 11             | 0.0286          | 72.7                   | 99.3                    | 87.5       | 100.0      | 100.0      | 99.7       | 35:01 (50)                  |
| 53:01                                    | 4             | 0.0084         | 2              | 0.0052          | 50.0                   | 100.0                   | 100.0      | 100.0      | 100.0      | 100.0      | –                           |
| 57:01                                    | 8             | 0.0168         | 4              | 0.0104          | 100.0                  | 100.0                   | 100.0      | 100.0      | 100.0      | 100.0      | –                           |
| 58:01                                    | 5             | 0.0105         | 6              | 0.0156          | 50.0                   | 100.0                   | 100.0      | 100.0      | 100.0      | 100.0      | –                           |
| <i>HLA-C: Overall accuracy: 98.4%</i>    |               |                |                |                 |                        |                         |            |            |            |            |                             |
| 01:02                                    | 24            | 0.0764         | 25             | 0.0874          | 80.0                   | 99.6                    | 95.0       | 100.0      | 100.0      | 99.6       | 08:01 (100)                 |
| 02:02                                    | 7             | 0.0223         | 6              | 0.0210          | 50.0                   | 100.0                   | 100.0      | 100.0      | 100.0      | 100.0      | –                           |
| 03:03                                    | 10            | 0.0318         | 5              | 0.0175          | 100.0                  | 100.0                   | 100.0      | 100.0      | 100.0      | 100.0      | –                           |
| 03:04                                    | 25            | 0.0796         | 26             | 0.0909          | 76.9                   | 98.8                    | 100.0      | 98.7       | 87.0       | 100.0      | –                           |
| 04:01                                    | 52            | 0.1656         | 49             | 0.1713          | 95.9                   | 100.0                   | 100.0      | 100.0      | 100.0      | 100.0      | –                           |
| 05:01                                    | 13            | 0.0414         | 12             | 0.0420          | 66.7                   | 100.0                   | 100.0      | 100.0      | 100.0      | 100.0      | –                           |
| 06:02                                    | 19            | 0.0605         | 17             | 0.0594          | 94.1                   | 100.0                   | 100.0      | 100.0      | 100.0      | 100.0      | –                           |
| 07:01                                    | 31            | 0.0987         | 29             | 0.1014          | 100.0                  | 100.0                   | 100.0      | 100.0      | 100.0      | 100.0      | –                           |
| 07:02                                    | 34            | 0.1083         | 30             | 0.1049          | 96.7                   | 100.0                   | 100.0      | 100.0      | 100.0      | 100.0      | –                           |
| 08:01                                    | 5             | 0.0159         | 5              | 0.0175          | 80.0                   | 99.6                    | 100.0      | 99.6       | 80.0       | 100.0      | –                           |
| 08:02                                    | 8             | 0.0255         | 8              | 0.0280          | 100.0                  | 100.0                   | 100.0      | 100.0      | 100.0      | 100.0      | –                           |
| 08:03                                    | 9             | 0.0287         | 7              | 0.0245          | 85.7                   | 100.0                   | 100.0      | 100.0      | 100.0      | 100.0      | –                           |
| 12:02                                    | 5             | 0.0159         | 5              | 0.0175          | 100.0                  | 100.0                   | 100.0      | 100.0      | 100.0      | 100.0      | –                           |
| 12:03                                    | 16            | 0.0510         | 12             | 0.0420          | 100.0                  | 100.0                   | 100.0      | 100.0      | 100.0      | 100.0      | –                           |
| 14:02                                    | 6             | 0.0191         | 6              | 0.0210          | 66.7                   | 100.0                   | 100.0      | 100.0      | 100.0      | 100.0      | –                           |
| 15:02                                    | 14            | 0.0446         | 15             | 0.0524          | 86.7                   | 100.0                   | 100.0      | 100.0      | 100.0      | 100.0      | –                           |
| 16:01                                    | 14            | 0.0446         | 14             | 0.0490          | 100.0                  | 100.0                   | 100.0      | 100.0      | 100.0      | 100.0      | –                           |
| 16:02                                    | 4             | 0.0127         | 3              | 0.0105          | 100.0                  | 100.0                   | 100.0      | 100.0      | 100.0      | 100.0      | –                           |
| 17:01                                    | 3             | 0.0096         | 4              | 0.0140          | 25.0                   | 100.0                   | 100.0      | 100.0      | 100.0      | 100.0      | –                           |
| <i>HLA-DRB1: Overall accuracy: 93.5%</i> |               |                |                |                 |                        |                         |            |            |            |            |                             |
| 01:01                                    | 12            | 0.0269         | 12             | 0.0305          | 41.7                   | 99.5                    | 80.0       | 100.0      | 100.0      | 99.7       | 01:03 (100)                 |
| 01:02                                    | 8             | 0.0179         | 9              | 0.0228          | 100.0                  | 100.0                   | 100.0      | 100.0      | 100.0      | 100.0      | –                           |
| 03:01                                    | 28            | 0.0628         | 27             | 0.0685          | 70.4                   | 100.0                   | 100.0      | 100.0      | 100.0      | 100.0      | –                           |
| 04:01                                    | 8             | 0.0179         | 6              | 0.0152          | 33.3                   | 99.5                    | 50.0       | 100.0      | 100.0      | 99.7       | 07:01 (50)                  |
| 04:04                                    | 24            | 0.0538         | 16             | 0.0406          | 18.8                   | 99.0                    | 33.3       | 100.0      | 100.0      | 99.5       | 04:07 (100)                 |
| 04:05                                    | 4             | 0.0090         | 4              | 0.0102          | 50.0                   | 100.0                   | 100.0      | 100.0      | 100.0      | 100.0      | –                           |
| 04:06                                    | 2             | 0.0045         | 2              | 0.0051          | 50.0                   | 100.0                   | 100.0      | 100.0      | 100.0      | 100.0      | –                           |
| 04:07                                    | 41            | 0.0919         | 31             | 0.0787          | 22.6                   | 98.5                    | 100.0      | 98.4       | 70.0       | 100.0      | –                           |
| 07:01                                    | 46            | 0.1031         | 42             | 0.1066          | 83.3                   | 99.5                    | 100.0      | 99.4       | 97.2       | 100.0      | –                           |
| 08:01                                    | 5             | 0.0112         | 5              | 0.0127          | 60.0                   | 99.5                    | 66.7       | 100.0      | 100.0      | 99.7       | 08:02 (100)                 |
| 08:02                                    | 37            | 0.0830         | 32             | 0.0812          | 62.5                   | 98.0                    | 100.0      | 97.8       | 83.3       | 100.0      | –                           |
| 09:01                                    | 26            | 0.0583         | 24             | 0.0609          | 75.0                   | 99.5                    | 100.0      | 99.5       | 94.7       | 100.0      | –                           |
| 10:01                                    | 4             | 0.0090         | 3              | 0.0076          | 100.0                  | 100.0                   | 100.0      | 100.0      | 100.0      | 100.0      | –                           |
| 11:04                                    | 17            | 0.0381         | 17             | 0.0431          | 5.9                    | 100.0                   | 100.0      | 100.0      | 100.0      | 100.0      | –                           |
| 12:01                                    | 6             | 0.0135         | 6              | 0.0152          | 50.0                   | 100.0                   | 100.0      | 100.0      | 100.0      | 100.0      | –                           |

Continued on next page ...

Table S7 – continued from previous page

| Allele <sup>1</sup>                      | Num.<br>Train | Freq.<br>Train | Num.<br>Valid. | Freq.<br>Valid. | CR <sup>2</sup><br>(%) | ACC <sup>3</sup><br>(%) | SEN<br>(%) | SPE<br>(%) | PPV<br>(%) | NPV<br>(%) | Miscall <sup>4</sup><br>(%) |
|------------------------------------------|---------------|----------------|----------------|-----------------|------------------------|-------------------------|------------|------------|------------|------------|-----------------------------|
| 13:01                                    | 14            | 0.0314         | 13             | 0.0330          | 69.2                   | 100.0                   | 100.0      | 100.0      | 100.0      | 100.0      | –                           |
| 13:02                                    | 16            | 0.0359         | 12             | 0.0305          | 50.0                   | 100.0                   | 100.0      | 100.0      | 100.0      | 100.0      | –                           |
| 14:01                                    | 6             | 0.0135         | 5              | 0.0127          | 80.0                   | 100.0                   | 100.0      | 100.0      | 100.0      | 100.0      | –                           |
| 14:02                                    | 22            | 0.0493         | 20             | 0.0508          | 55.0                   | 98.5                    | 81.8       | 99.5       | 90.0       | 99.5       | 14:06 (100)                 |
| 14:06                                    | 9             | 0.0202         | 11             | 0.0279          | 63.6                   | 98.5                    | 85.7       | 99.0       | 75.0       | 99.7       | 07:01 (50)                  |
| 15:01                                    | 20            | 0.0448         | 22             | 0.0558          | 68.2                   | 100.0                   | 100.0      | 100.0      | 100.0      | 100.0      | –                           |
| 15:02                                    | 6             | 0.0135         | 8              | 0.0203          | 87.5                   | 100.0                   | 100.0      | 100.0      | 100.0      | 100.0      | –                           |
| 16:01                                    | 3             | 0.0067         | 4              | 0.0102          | 100.0                  | 100.0                   | 100.0      | 100.0      | 100.0      | 100.0      | –                           |
| 16:02                                    | 9             | 0.0202         | 9              | 0.0228          | 11.1                   | 100.0                   | 100.0      | 100.0      | 100.0      | 100.0      | –                           |
| <i>HLA-DQA1: Overall accuracy: 95.8%</i> |               |                |                |                 |                        |                         |            |            |            |            |                             |
| 01:01                                    | 20            | 0.0719         | 20             | 0.0769          | 100.0                  | 98.3                    | 100.0      | 98.1       | 83.3       | 100.0      | –                           |
| 01:02                                    | 28            | 0.1007         | 30             | 0.1154          | 83.3                   | 98.7                    | 92.0       | 99.5       | 95.8       | 99.2       | 01:01 (100)                 |
| 01:03                                    | 14            | 0.0504         | 13             | 0.0500          | 92.3                   | 99.6                    | 91.7       | 100.0      | 100.0      | 99.6       | 01:02 (100)                 |
| 01:04                                    | 3             | 0.0108         | 3              | 0.0115          | 66.7                   | 99.6                    | 50.0       | 100.0      | 100.0      | 99.6       | 01:01 (100)                 |
| 02:01                                    | 37            | 0.1331         | 31             | 0.1192          | 100.0                  | 100.0                   | 100.0      | 100.0      | 100.0      | 100.0      | –                           |
| 03:01                                    | 57            | 0.2050         | 47             | 0.1808          | 89.4                   | 97.9                    | 100.0      | 97.4       | 89.4       | 100.0      | –                           |
| 03:02                                    | 15            | 0.0540         | 15             | 0.0577          | 86.7                   | 99.2                    | 84.6       | 100.0      | 100.0      | 99.2       | 03:01 (100)                 |
| 03:03                                    | 11            | 0.0396         | 11             | 0.0423          | 72.7                   | 98.7                    | 62.5       | 100.0      | 100.0      | 98.8       | 03:01 (100)                 |
| 04:01                                    | 33            | 0.1187         | 26             | 0.1000          | 100.0                  | 100.0                   | 100.0      | 100.0      | 100.0      | 100.0      | –                           |
| 05:01                                    | 21            | 0.0755         | 19             | 0.0731          | 100.0                  | 100.0                   | 100.0      | 100.0      | 100.0      | 100.0      | –                           |
| 05:03                                    | 11            | 0.0396         | 10             | 0.0385          | 90.0                   | 100.0                   | 100.0      | 100.0      | 100.0      | 100.0      | –                           |
| 05:05                                    | 26            | 0.0935         | 34             | 0.1308          | 82.4                   | 100.0                   | 100.0      | 100.0      | 100.0      | 100.0      | –                           |
| <i>HLA-DQB1 Overall accuracy: 98.9%</i>  |               |                |                |                 |                        |                         |            |            |            |            |                             |
| 02:01                                    | 23            | 0.0710         | 23             | 0.0767          | 91.3                   | 100.0                   | 100.0      | 100.0      | 100.0      | 100.0      | –                           |
| 02:02                                    | 36            | 0.1111         | 29             | 0.0967          | 96.6                   | 99.6                    | 96.4       | 100.0      | 100.0      | 99.6       | 03:01 (100)                 |
| 03:01                                    | 62            | 0.1914         | 64             | 0.2133          | 89.1                   | 98.9                    | 100.0      | 98.6       | 95.0       | 100.0      | –                           |
| 03:02                                    | 62            | 0.1914         | 58             | 0.1933          | 96.6                   | 100.0                   | 100.0      | 100.0      | 100.0      | 100.0      | –                           |
| 03:03                                    | 20            | 0.0617         | 21             | 0.0700          | 76.2                   | 100.0                   | 100.0      | 100.0      | 100.0      | 100.0      | –                           |
| 04:02                                    | 39            | 0.1204         | 30             | 0.1000          | 90.0                   | 100.0                   | 100.0      | 100.0      | 100.0      | 100.0      | –                           |
| 05:01                                    | 27            | 0.0833         | 27             | 0.0900          | 100.0                  | 100.0                   | 100.0      | 100.0      | 100.0      | 100.0      | –                           |
| 05:03                                    | 4             | 0.0123         | 5              | 0.0167          | 60.0                   | 100.0                   | 100.0      | 100.0      | 100.0      | 100.0      | –                           |
| 06:01                                    | 5             | 0.0154         | 4              | 0.0133          | 100.0                  | 100.0                   | 100.0      | 100.0      | 100.0      | 100.0      | –                           |
| 06:02                                    | 19            | 0.0586         | 17             | 0.0567          | 82.4                   | 100.0                   | 100.0      | 100.0      | 100.0      | 100.0      | –                           |
| 06:03                                    | 11            | 0.0340         | 9              | 0.0300          | 100.0                  | 100.0                   | 100.0      | 100.0      | 100.0      | 100.0      | –                           |
| 06:04                                    | 7             | 0.0216         | 6              | 0.0200          | 100.0                  | 100.0                   | 100.0      | 100.0      | 100.0      | 100.0      | –                           |
| <i>HLA-DPB1: Overall accuracy: 97.5%</i> |               |                |                |                 |                        |                         |            |            |            |            |                             |
| 01:01                                    | 10            | 0.0360         | 10             | 0.0403          | 100.0                  | 100.0                   | 100.0      | 100.0      | 100.0      | 100.0      | –                           |
| 02:01                                    | 31            | 0.1115         | 30             | 0.1210          | 70.0                   | 99.0                    | 95.2       | 99.4       | 95.2       | 99.6       | 04:01 (100)                 |
| 02:02                                    | 3             | 0.0108         | 3              | 0.0121          | 66.7                   | 100.0                   | 100.0      | 100.0      | 100.0      | 100.0      | –                           |
| 04:01                                    | 70            | 0.2518         | 71             | 0.2863          | 87.3                   | 99.5                    | 100.0      | 99.3       | 98.4       | 100.0      | –                           |
| 04:02                                    | 75            | 0.2698         | 64             | 0.2581          | 96.9                   | 100.0                   | 100.0      | 100.0      | 100.0      | 100.0      | –                           |
| 05:01                                    | 10            | 0.0360         | 9              | 0.0363          | 88.9                   | 100.0                   | 100.0      | 100.0      | 100.0      | 100.0      | –                           |
| 11:01                                    | 8             | 0.0288         | 8              | 0.0323          | 75.0                   | 100.0                   | 100.0      | 100.0      | 100.0      | 100.0      | –                           |
| 13:01                                    | 13            | 0.0468         | 9              | 0.0363          | 77.8                   | 99.5                    | 100.0      | 99.5       | 87.5       | 100.0      | –                           |
| 14:01                                    | 18            | 0.0647         | 17             | 0.0685          | 88.2                   | 99.5                    | 100.0      | 99.5       | 93.8       | 100.0      | –                           |
| 17:01                                    | 5             | 0.0180         | 5              | 0.0202          | 40.0                   | 100.0                   | 100.0      | 100.0      | 100.0      | 100.0      | –                           |

Continued on next page ...

Table S7 – continued from previous page

| Allele <sup>1</sup> | Num.<br>Train | Freq.<br>Train | Num.<br>Valid. | Freq.<br>Valid. | CR <sup>2</sup><br>(%) | ACC <sup>3</sup><br>(%) | SEN<br>(%) | SPE<br>(%) | PPV<br>(%) | NPV<br>(%) | Miscall <sup>4</sup><br>(%) |
|---------------------|---------------|----------------|----------------|-----------------|------------------------|-------------------------|------------|------------|------------|------------|-----------------------------|
| 104:01              | 4             | 0.0144         | 4              | 0.0161          | 75.0                   | 100.0                   | 100.0      | 100.0      | 100.0      | 100.0      | –                           |

<sup>1</sup>: the HLA alleles with more than one copy and non-zero sensitivity in the training are listed.

<sup>2</sup>: CR – call rate.

<sup>3</sup>: ACC – allele accuracy.

<sup>4</sup>: the most likely miscalled allele and the proportion of the most likely miscalled allele in all miscalled alleles.

Table S8: The sensitivity (SEN), specificity (SPE), positive predictive value (PPV) and negative predictive value (NPV) calculated from validation samples for each four-digit HLA allele with call threshold 0.5, when STUDY Data of African ancestry were divided to training and validation parts with equal sizes. The SNP markers in the intersect of Illumina platforms were used.

| Allele <sup>1</sup>                   | Num.<br>Train | Freq.<br>Train | Num.<br>Valid. | Freq.<br>Valid. | CR <sup>2</sup><br>(%) | ACC <sup>3</sup><br>(%) | SEN<br>(%) | SPE<br>(%) | PPV<br>(%) | NPV<br>(%) | Miscall <sup>4</sup><br>(%) |
|---------------------------------------|---------------|----------------|----------------|-----------------|------------------------|-------------------------|------------|------------|------------|------------|-----------------------------|
| <i>HLA-A: Overall accuracy: 100%</i>  |               |                |                |                 |                        |                         |            |            |            |            |                             |
| 01:01                                 | 5             | 0.0309         | 4              | 0.0339          | 75.0                   | 100.0                   | 100.0      | 100.0      | 100.0      | 100.0      | –                           |
| 02:01                                 | 14            | 0.0864         | 10             | 0.0847          | 80.0                   | 100.0                   | 100.0      | 100.0      | 100.0      | 100.0      | –                           |
| 02:05                                 | 4             | 0.0247         | 2              | 0.0169          | 50.0                   | 100.0                   | 100.0      | 100.0      | 100.0      | 100.0      | –                           |
| 03:01                                 | 15            | 0.0926         | 9              | 0.0763          | 88.9                   | 100.0                   | 100.0      | 100.0      | 100.0      | 100.0      | –                           |
| 23:01                                 | 11            | 0.0679         | 11             | 0.0932          | 90.9                   | 100.0                   | 100.0      | 100.0      | 100.0      | 100.0      | –                           |
| 24:02                                 | 3             | 0.0185         | 2              | 0.0169          | 100.0                  | 100.0                   | 100.0      | 100.0      | 100.0      | 100.0      | –                           |
| 26:01                                 | 4             | 0.0247         | 3              | 0.0254          | 66.7                   | 100.0                   | 100.0      | 100.0      | 100.0      | 100.0      | –                           |
| 29:02                                 | 3             | 0.0185         | 4              | 0.0339          | 25.0                   | 100.0                   | 100.0      | 100.0      | 100.0      | 100.0      | –                           |
| 30:01                                 | 14            | 0.0864         | 11             | 0.0932          | 90.9                   | 100.0                   | 100.0      | 100.0      | 100.0      | 100.0      | –                           |
| 30:02                                 | 8             | 0.0494         | 11             | 0.0932          | 72.7                   | 100.0                   | 100.0      | 100.0      | 100.0      | 100.0      | –                           |
| 33:01                                 | 3             | 0.0185         | 2              | 0.0169          | 100.0                  | 100.0                   | 100.0      | 100.0      | 100.0      | 100.0      | –                           |
| 33:03                                 | 13            | 0.0802         | 6              | 0.0508          | 100.0                  | 100.0                   | 100.0      | 100.0      | 100.0      | 100.0      | –                           |
| 34:02                                 | 6             | 0.0370         | 6              | 0.0508          | 100.0                  | 100.0                   | 100.0      | 100.0      | 100.0      | 100.0      | –                           |
| 36:01                                 | 9             | 0.0556         | 12             | 0.1017          | 91.7                   | 100.0                   | 100.0      | 100.0      | 100.0      | 100.0      | –                           |
| 68:01                                 | 5             | 0.0309         | 4              | 0.0339          | 75.0                   | 100.0                   | 100.0      | 100.0      | 100.0      | 100.0      | –                           |
| 68:02                                 | 13            | 0.0802         | 10             | 0.0847          | 70.0                   | 100.0                   | 100.0      | 100.0      | 100.0      | 100.0      | –                           |
| <i>HLA-B: Overall accuracy: 96.7%</i> |               |                |                |                 |                        |                         |            |            |            |            |                             |
| 07:02                                 | 17            | 0.0850         | 10             | 0.0704          | 30.0                   | 100.0                   | 100.0      | 100.0      | 100.0      | 100.0      | –                           |
| 14:02                                 | 2             | 0.0100         | 2              | 0.0141          | 50.0                   | 100.0                   | 100.0      | 100.0      | 100.0      | 100.0      | –                           |
| 15:03                                 | 9             | 0.0450         | 8              | 0.0563          | 25.0                   | 100.0                   | 100.0      | 100.0      | 100.0      | 100.0      | –                           |
| 18:01                                 | 8             | 0.0400         | 4              | 0.0282          | 25.0                   | 100.0                   | 100.0      | 100.0      | 100.0      | 100.0      | –                           |
| 35:01                                 | 14            | 0.0700         | 9              | 0.0634          | 22.2                   | 100.0                   | 100.0      | 100.0      | 100.0      | 100.0      | –                           |
| 42:01                                 | 11            | 0.0550         | 6              | 0.0423          | 50.0                   | 96.7                    | 100.0      | 96.3       | 75.0       | 100.0      | –                           |
| 45:01                                 | 6             | 0.0300         | 3              | 0.0211          | 100.0                  | 100.0                   | 100.0      | 100.0      | 100.0      | 100.0      | –                           |
| 49:01                                 | 6             | 0.0300         | 5              | 0.0352          | 20.0                   | 100.0                   | 100.0      | 100.0      | 100.0      | 100.0      | –                           |
| 53:01                                 | 24            | 0.1200         | 21             | 0.1479          | 47.6                   | 100.0                   | 100.0      | 100.0      | 100.0      | 100.0      | –                           |
| 57:03                                 | 8             | 0.0400         | 6              | 0.0423          | 16.7                   | 100.0                   | 100.0      | 100.0      | 100.0      | 100.0      | –                           |
| 58:02                                 | 8             | 0.0400         | 5              | 0.0352          | 40.0                   | 100.0                   | 100.0      | 100.0      | 100.0      | 100.0      | –                           |
| <i>HLA-C: Overall accuracy: 96.5%</i> |               |                |                |                 |                        |                         |            |            |            |            |                             |
| 02:02                                 | 9             | 0.0608         | 9              | 0.0692          | 44.4                   | 97.7                    | 50.0       | 100.0      | 100.0      | 98.4       | 02:10 (100)                 |
| 02:10                                 | 5             | 0.0338         | 5              | 0.0385          | 20.0                   | 97.7                    | 100.0      | 97.6       | 33.3       | 100.0      | –                           |
| 03:02                                 | 4             | 0.0270         | 5              | 0.0385          | 80.0                   | 100.0                   | 100.0      | 100.0      | 100.0      | 100.0      | –                           |
| 04:01                                 | 28            | 0.1892         | 25             | 0.1923          | 80.0                   | 100.0                   | 100.0      | 100.0      | 100.0      | 100.0      | –                           |
| 06:02                                 | 6             | 0.0405         | 11             | 0.0846          | 63.6                   | 100.0                   | 100.0      | 100.0      | 100.0      | 100.0      | –                           |
| 07:01                                 | 24            | 0.1622         | 9              | 0.0692          | 100.0                  | 100.0                   | 100.0      | 100.0      | 100.0      | 100.0      | –                           |
| 07:02                                 | 13            | 0.0878         | 8              | 0.0615          | 62.5                   | 100.0                   | 100.0      | 100.0      | 100.0      | 100.0      | –                           |
| 08:04                                 | 8             | 0.0541         | 4              | 0.0308          | 50.0                   | 98.8                    | 100.0      | 98.8       | 66.7       | 100.0      | –                           |
| 14:02                                 | 3             | 0.0203         | 3              | 0.0231          | 66.7                   | 100.0                   | 100.0      | 100.0      | 100.0      | 100.0      | –                           |
| 16:01                                 | 15            | 0.1014         | 20             | 0.1538          | 90.0                   | 100.0                   | 100.0      | 100.0      | 100.0      | 100.0      | –                           |
| 17:01                                 | 11            | 0.0743         | 12             | 0.0923          | 91.7                   | 100.0                   | 100.0      | 100.0      | 100.0      | 100.0      | –                           |

Continued on next page ...

Table S8 – continued from previous page

| Allele <sup>1</sup>                      | Num.<br>Train | Freq.<br>Train | Num.<br>Valid. | Freq.<br>Valid. | CR <sup>2</sup><br>(%) | ACC <sup>3</sup><br>(%) | SEN<br>(%) | SPE<br>(%) | PPV<br>(%) | NPV<br>(%) | Miscall <sup>4</sup><br>(%) |
|------------------------------------------|---------------|----------------|----------------|-----------------|------------------------|-------------------------|------------|------------|------------|------------|-----------------------------|
| 18:01                                    | 5             | 0.0338         | 3              | 0.0231          | 66.7                   | 100.0                   | 100.0      | 100.0      | 100.0      | 100.0      | –                           |
| <i>HLA-DRB1: Overall accuracy: 100%</i>  |               |                |                |                 |                        |                         |            |            |            |            |                             |
| 01:02                                    | 5             | 0.0281         | 3              | 0.0208          | 33.3                   | 100.0                   | 100.0      | 100.0      | 100.0      | 100.0      | –                           |
| 03:01                                    | 11            | 0.0618         | 9              | 0.0625          | 22.2                   | 100.0                   | 100.0      | 100.0      | 100.0      | 100.0      | –                           |
| 03:02                                    | 9             | 0.0506         | 11             | 0.0764          | 27.3                   | 100.0                   | 100.0      | 100.0      | 100.0      | 100.0      | –                           |
| 07:01                                    | 19            | 0.1067         | 13             | 0.0903          | 30.8                   | 100.0                   | 100.0      | 100.0      | 100.0      | 100.0      | –                           |
| 08:04                                    | 11            | 0.0618         | 11             | 0.0764          | 36.4                   | 100.0                   | 100.0      | 100.0      | 100.0      | 100.0      | –                           |
| 09:01                                    | 6             | 0.0337         | 6              | 0.0417          | 33.3                   | 100.0                   | 100.0      | 100.0      | 100.0      | 100.0      | –                           |
| 11:01                                    | 13            | 0.0730         | 12             | 0.0833          | 33.3                   | 100.0                   | 100.0      | 100.0      | 100.0      | 100.0      | –                           |
| 11:02                                    | 6             | 0.0337         | 5              | 0.0347          | 40.0                   | 100.0                   | 100.0      | 100.0      | 100.0      | 100.0      | –                           |
| 13:01                                    | 13            | 0.0730         | 13             | 0.0903          | 15.4                   | 100.0                   | 100.0      | 100.0      | 100.0      | 100.0      | –                           |
| 13:02                                    | 10            | 0.0562         | 8              | 0.0556          | 12.5                   | 100.0                   | 100.0      | 100.0      | 100.0      | 100.0      | –                           |
| 13:03                                    | 11            | 0.0618         | 8              | 0.0556          | 25.0                   | 100.0                   | 100.0      | 100.0      | 100.0      | 100.0      | –                           |
| 15:03                                    | 17            | 0.0955         | 13             | 0.0903          | 30.8                   | 100.0                   | 100.0      | 100.0      | 100.0      | 100.0      | –                           |
| 16:02                                    | 3             | 0.0169         | 3              | 0.0208          | 33.3                   | 100.0                   | 100.0      | 100.0      | 100.0      | 100.0      | –                           |
| <i>HLA-DQA1: Overall accuracy: 97.2%</i> |               |                |                |                 |                        |                         |            |            |            |            |                             |
| 01:01                                    | 10            | 0.0725         | 9              | 0.0692          | 11.1                   | 100.0                   | 100.0      | 100.0      | 100.0      | 100.0      | –                           |
| 01:02                                    | 41            | 0.2971         | 31             | 0.2385          | 35.5                   | 100.0                   | 100.0      | 100.0      | 100.0      | 100.0      | –                           |
| 01:03                                    | 10            | 0.0725         | 10             | 0.0769          | 40.0                   | 100.0                   | 100.0      | 100.0      | 100.0      | 100.0      | –                           |
| 02:01                                    | 16            | 0.1159         | 16             | 0.1231          | 56.2                   | 100.0                   | 100.0      | 100.0      | 100.0      | 100.0      | –                           |
| 04:01                                    | 15            | 0.1087         | 15             | 0.1154          | 33.3                   | 100.0                   | 100.0      | 100.0      | 100.0      | 100.0      | –                           |
| 05:01                                    | 14            | 0.1014         | 19             | 0.1462          | 26.3                   | 97.2                    | 100.0      | 96.8       | 83.3       | 100.0      | –                           |
| <i>HLA-DQB1 Overall accuracy: 97.7%</i>  |               |                |                |                 |                        |                         |            |            |            |            |                             |
| 02:01                                    | 17            | 0.1149         | 16             | 0.1270          | 18.8                   | 100.0                   | 100.0      | 100.0      | 100.0      | 100.0      | –                           |
| 03:01                                    | 20            | 0.1351         | 16             | 0.1270          | 25.0                   | 100.0                   | 100.0      | 100.0      | 100.0      | 100.0      | –                           |
| 03:02                                    | 7             | 0.0473         | 6              | 0.0476          | 66.7                   | 100.0                   | 100.0      | 100.0      | 100.0      | 100.0      | –                           |
| 04:02                                    | 11            | 0.0743         | 10             | 0.0794          | 70.0                   | 100.0                   | 100.0      | 100.0      | 100.0      | 100.0      | –                           |
| 05:01                                    | 18            | 0.1216         | 19             | 0.1508          | 47.4                   | 97.7                    | 100.0      | 97.1       | 90.0       | 100.0      | –                           |
| 05:02                                    | 6             | 0.0405         | 5              | 0.0397          | 60.0                   | 100.0                   | 100.0      | 100.0      | 100.0      | 100.0      | –                           |
| 06:02                                    | 26            | 0.1757         | 18             | 0.1429          | 66.7                   | 97.7                    | 91.7       | 100.0      | 100.0      | 99.1       | 05:01 (100)                 |
| 06:03                                    | 7             | 0.0473         | 6              | 0.0476          | 16.7                   | 100.0                   | 100.0      | 100.0      | 100.0      | 100.0      | –                           |
| 06:09                                    | 4             | 0.0270         | 2              | 0.0159          | 50.0                   | 100.0                   | 100.0      | 100.0      | 100.0      | 100.0      | –                           |
| <i>HLA-DPB1: Overall accuracy: 75.0%</i> |               |                |                |                 |                        |                         |            |            |            |            |                             |
| 01:01                                    | 17            | 0.1932         | 16             | 0.2581          | 31.2                   | 75.0                    | 100.0      | 33.3       | 71.4       | 100.0      | –                           |
| 04:01                                    | 8             | 0.0909         | 6              | 0.0968          | 16.7                   | 100.0                   | 100.0      | 100.0      | 100.0      | 100.0      | –                           |

<sup>1</sup>: the HLA alleles with more than one copy and non-zero sensitivity in the training are listed.

<sup>2</sup>: CR – call rate.

<sup>3</sup>: ACC – allele accuracy.

<sup>4</sup>: the most likely miscalled allele and the proportion of the most likely miscalled allele in all miscalled alleles.

Table S9: The accuracies calculated from the ethnic-specific and multi-ethnic models. For each ethnicity, STUDY Data were divided into training and validation sets with equal sizes. The multi-ethnic model was built using all training samples from multiple ethnicities, whereas the ethnic-specific models were built using the training part of each ethnicity respectively. No call threshold was executed.

|                                 | <i>HLA -</i> |          |          |             |             |             |             |
|---------------------------------|--------------|----------|----------|-------------|-------------|-------------|-------------|
|                                 | <i>A</i>     | <i>B</i> | <i>C</i> | <i>DRB1</i> | <i>DQA1</i> | <i>DQB1</i> | <i>DPB1</i> |
| <b><i>European ancestry</i></b> |              |          |          |             |             |             |             |
| multi-ethnic model              | 98.5         | 96.5     | 99.1     | 92.8        | 97.2        | 98.7        | 93.9        |
| ethnic-specific model           | 98.2         | 96.6     | 98.8     | 92.1        | 97.3        | 98.8        | 93.8        |
| <b><i>Asian ancestry</i></b>    |              |          |          |             |             |             |             |
| multi-ethnic model              | 89.1         | 85.8     | 95.6     | 87.2        | 86.2        | 96.5        | 90.4        |
| ethnic-specific model           | 92.1         | 87.5     | 96.6     | 88.7        | 86.8        | 96.0        | 89.8        |
| <b><i>Hispanic ancestry</i></b> |              |          |          |             |             |             |             |
| multi-ethnic model              | 93.1         | 77.1     | 94.4     | 81.5        | 96.5        | 97.7        | 95.2        |
| ethnic-specific model           | 93.4         | 75.0     | 96.2     | 82.0        | 93.8        | 95.7        | 93.1        |
| <b><i>African ancestry</i></b>  |              |          |          |             |             |             |             |
| multi-ethnic model              | 94.1         | 81.7     | 94.6     | 78.5        | 79.2        | 80.2        | 83.9        |
| ethnic-specific model           | 92.4         | 76.8     | 88.5     | 77.1        | 80.0        | 79.4        | 74.2        |
